# Supplementary material for: A simple strategy to overcome concentration dependence of photoswitching properties in donor–acceptor Stenhouse adducts
Source: Royal Society of Chemistry journal article supplement (doi:10.1039/d0cp06312f), 2021-01-01
Supplement: d0cp06312f1.pdf [file d0cp06312f1.pdf]

# A Simple Strategy to Overcome Concentration Dependence of Photoswitching Properties in Donor-Acceptor Stenhouse Adducts

Sean W. Connolly,<sup>‡</sup> Rahul Tiwari,<sup>‡,†</sup> Simon Holder<sup>‡</sup> and Helena J. Shepherd<sup>\*,‡</sup>

<sup>‡</sup> Supramolecular, Interfacial and Synthetic Chemistry Group, School of Physical Sciences, University of Kent, Canterbury, CT2 7NH, UK.

<sup>†</sup> Present address: School of Pharmacy, University of East Anglia, Norwich, NR4 7TJ, UK.

## Table of Contents

|     |                                                    |    |
|-----|----------------------------------------------------|----|
| 1.0 | UV-Vis spectroscopy .....                          | 3  |
| 1.1 | UV-Vis spectroscopy data for DASA 1.....           | 3  |
| 1.2 | UV-Vis spectroscopy data for DASA 2.....           | 6  |
| 1.3 | UV-Vis spectroscopy data for DASA 3.....           | 9  |
| 1.4 | UV-Vis Spectroscopy data for DASA 4.....           | 10 |
| 1.5 | DASAs 3 and 4 photoswitching with Piperazine ..... | 11 |
| 1.6 | UV-Vis spectroscopy for DASA 5.....                | 12 |
| 2   | Synthetic Methods.....                             | 13 |
| 3   | NMR Spectral Data .....                            | 16 |
| 4   | Single crystal X-ray diffraction (SCXRD) .....     | 22 |
| 4.1 | DASA 1 (chloroform solvate) .....                  | 22 |
| 4.2 | DASA 1 (H <sub>2</sub> O solvate) .....            | 22 |
| 4.3 | DASA 2 (H <sub>2</sub> O solvate) .....            | 23 |
| 4.4 | DASA 4 .....                                       | 23 |
| 4.5 | Extended Crystal Packing.....                      | 24 |
| 5   | Computational experiments .....                    | 25 |
| 5.1 | DASA 1 modelling .....                             | 26 |
| 5.2 | DASA 2 modelling .....                             | 28 |
| 5.3 | DASA 3 modelling .....                             | 30 |
| 5.4 | DASA 4 modelling .....                             | 32 |
| 5.5 | Charge on Nitrogen atoms in donor moieties .....   | 34 |
| 5.6 | Density functional theory calculations .....       | 35 |
| 6   | References .....                                   | 40 |

## 1.0 UV-Vis spectroscopy

UV-Vis measurements were recorded using a Shimadzu UV-1800 spectrometer. Spectra were recorded over a range of 400 – 650 nm. The samples were irradiated from all directions using a 50 W, 650 K, full spectrum LED flood light, illuminating the samples inside a container with reflective mylar surfaces. A temperature of between 20 and 25°C was maintained throughout the irradiation of samples in each experiment. Samples were continuously irradiated and sequential measurements of the UV-Vis absorbance were taken. Cuvettes with a path length of 1 mm were used for all measurements. Thermal reversion of the photo-isomerisation was achieved through heating in the dark at 50°C. The interval time between measurements is shown in the individual absorption spectra of each compound. Samples were first dissolved in DMSO to create a 0.01 M solution, which was subsequently diluted with chloroform to the desired concentration. All of the final solutions that were measured through UV-Vis were in solutions of chloroform with 2% DMSO.

### 1.1 UV-Vis spectroscopy data for DASA 1

Individual absorption spectra for DASA 1 in chloroform (2% DMSO) at each concentration reported. These spectra correspond with the data displayed in fig. 2 in the main text.

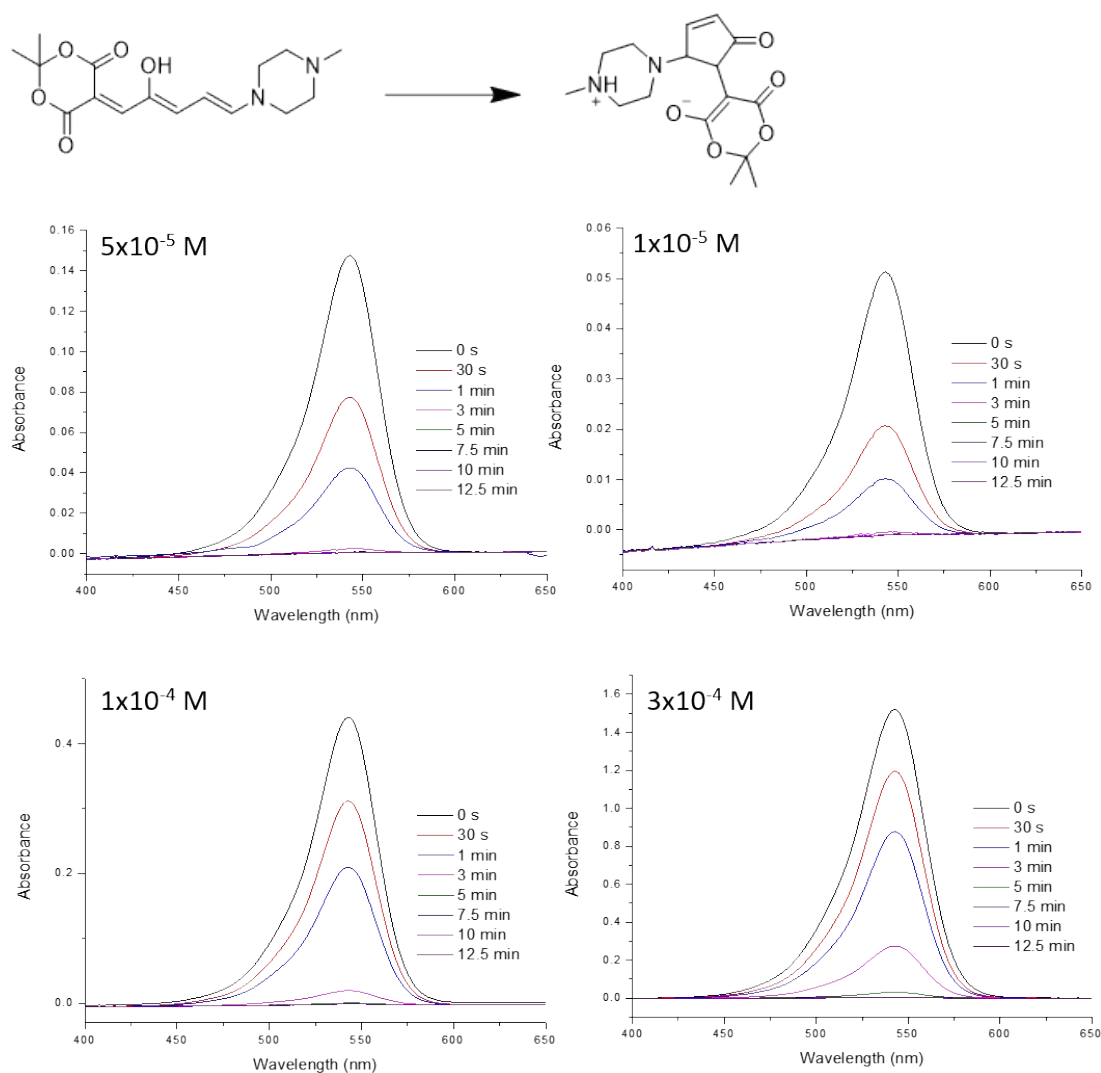

Figure S1. Absorption spectra for DASA 1 in chloroform (2% DMSO) at each concentration reported.

Absorption data for DASA 1 with absorbance plotted as a function of time, displaying the forward and reverse photoswitching reactions. Heating is required for full and fast recovery of the absorbance after irradiation.

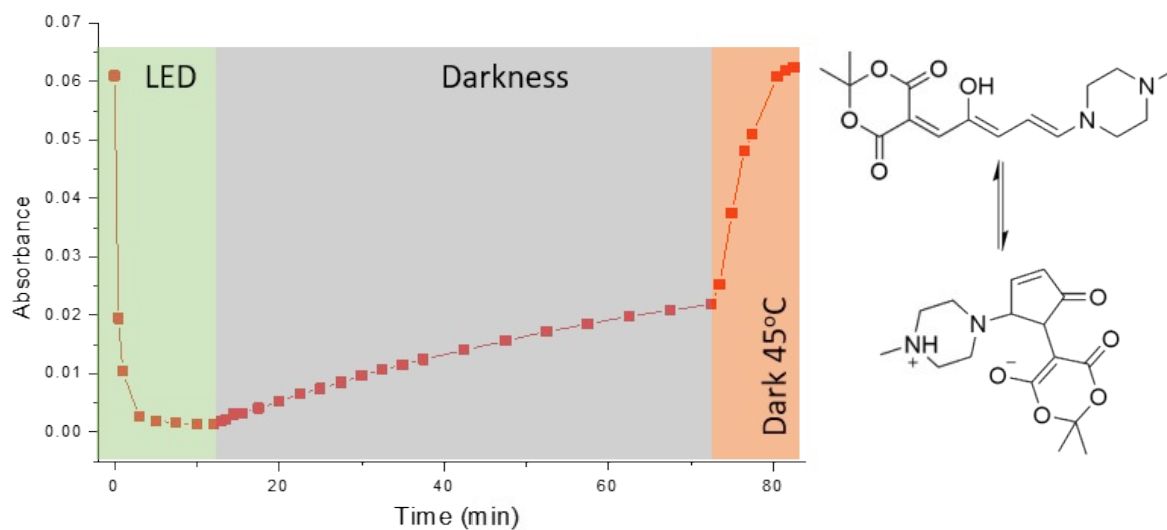

Figure S2. Plot displaying Absorbance as a function of time for DASA 1 for the forward and back photoswitching reactions in chloroform (2% DMSO), 10  $\mu$ M.

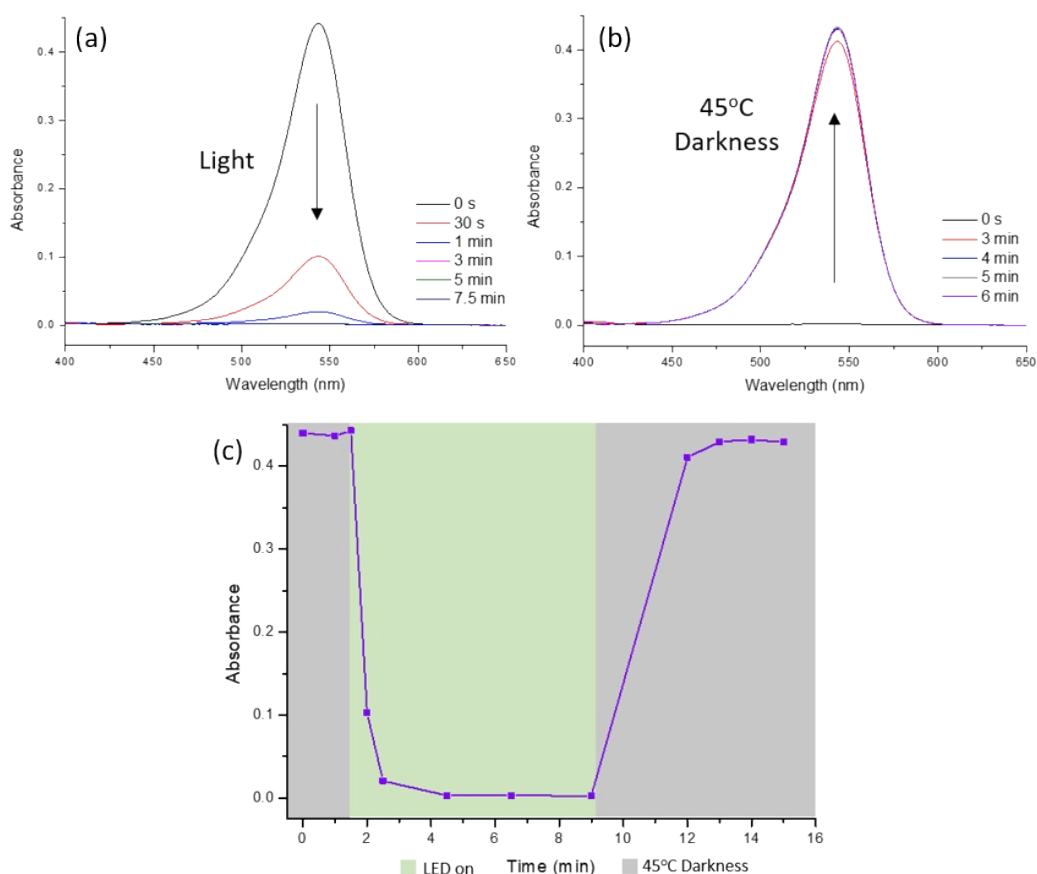

Figure S3. Absorption spectra for DASA 1 in pure chloroform at 100  $\mu$ M ( $1 \times 10^{-4}$  M). (a) Spectrum of the isomerisation from the linear to cyclized forms. (b) Spectrum of the reverse reaction from cyclized to linear. (c) Plot displaying absorbance as a function of time.

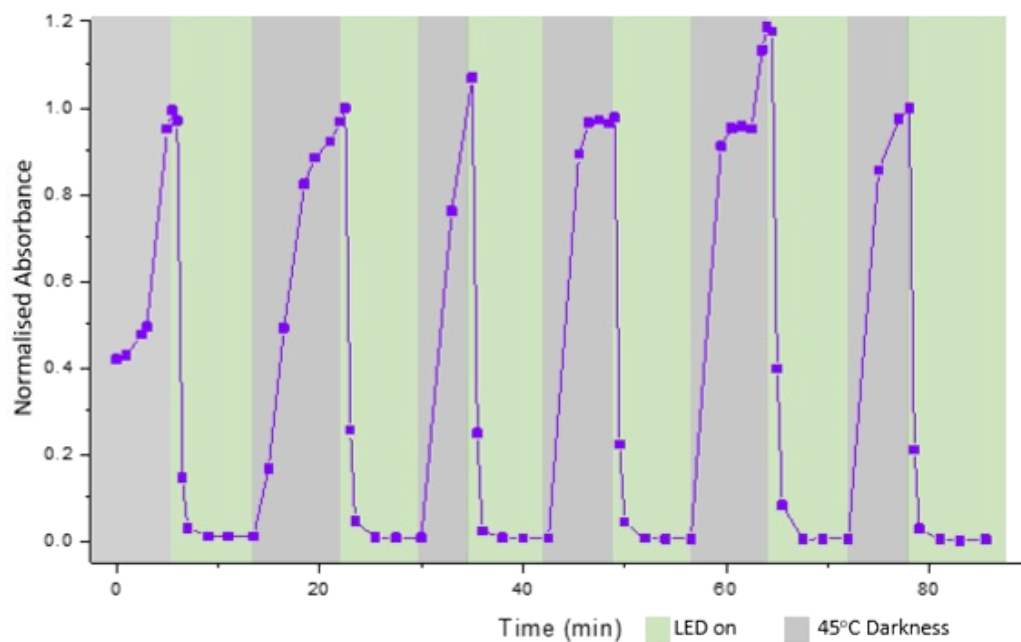

Figure S4. Absorption spectrum for DASA 1, in pure chloroform, 100  $\mu\text{M}$  ( $1 \times 10^{-4}$  M). Normalized absorbance plotted as a function of time over multiple photoswitching cycles. Minor variation in the irradiation time and recovery of absorbance are due to slight unavoidable variation in the temperature of the oven used to heat the samples over multiple cycles. The piperazine based DASAs showed more temperature sensitive behaviour than others with changes of  $>2^\circ\text{C}$  resulting in changes in the absorbance.

## 1.2 UV-Vis spectroscopy data for DASA 2

Individual absorption spectra for DASA 2 in chloroform (2% DMSO) at each concentration reported. These spectra correspond with the data displayed in fig. 2 in the main text.

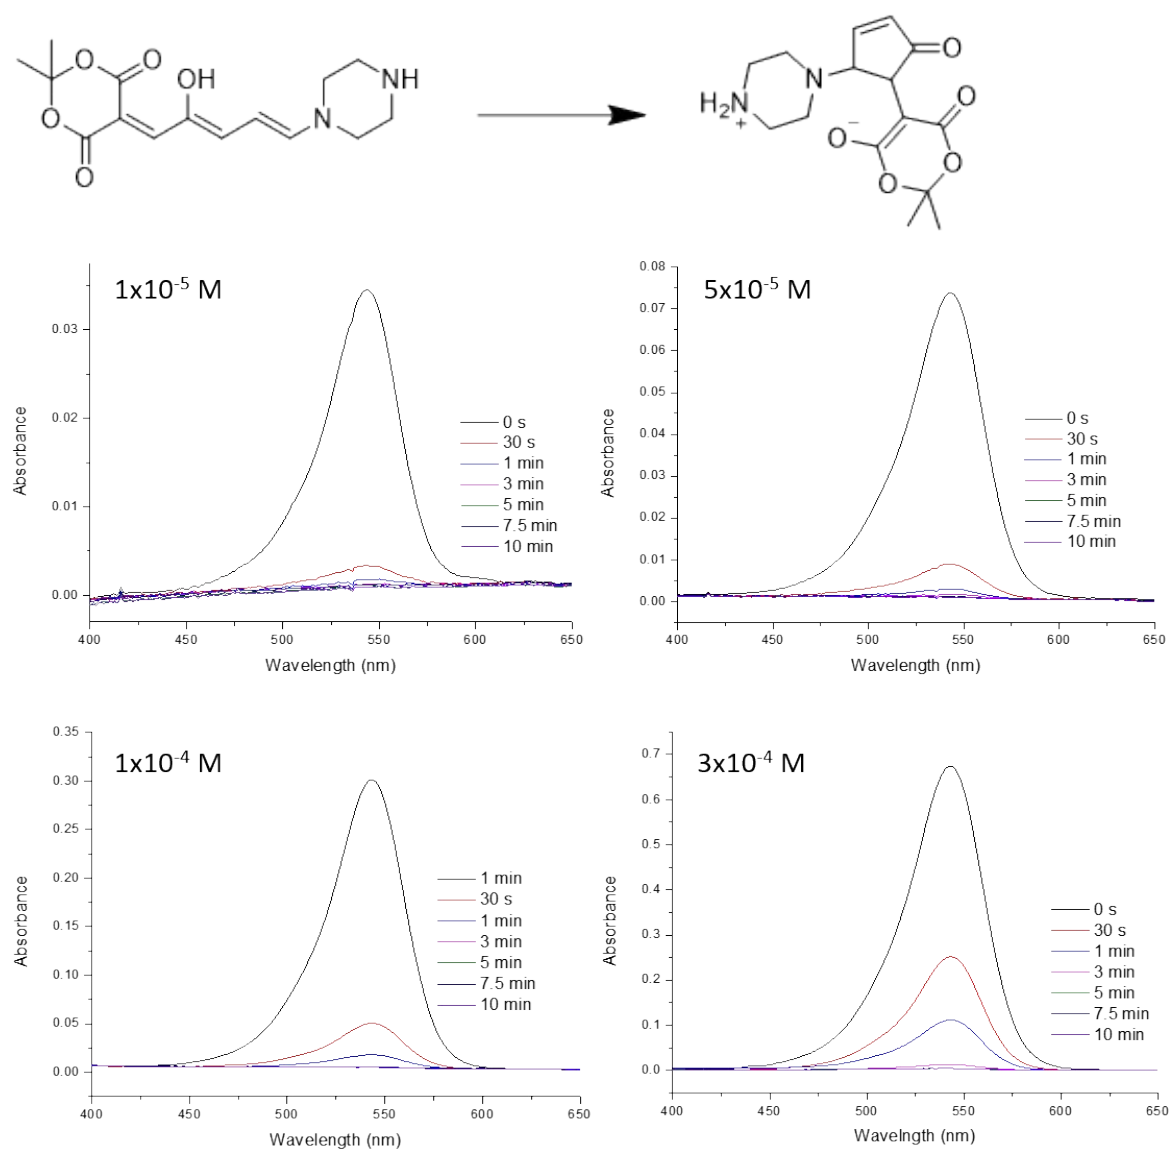

Figure S5. Absorption spectra for DASA 1 in chloroform (2% DMSO) at each concentration reported.

Absorption data for DASA 2 with absorbance plotted as a function of time, displaying the forward and reverse photoswitching reactions. Heating is required for full and fast recovery of the absorbance after irradiation.

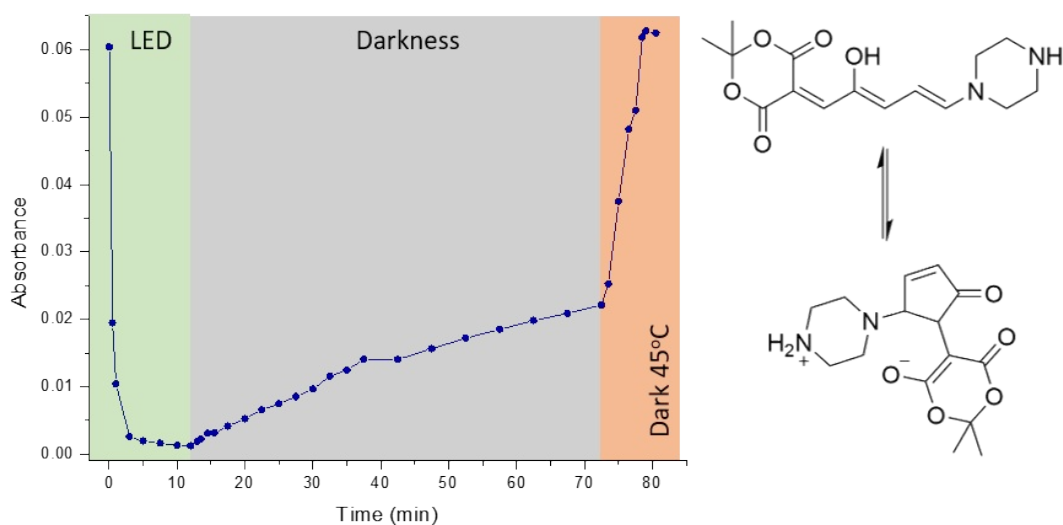

Figure S6. Plot displaying Absorbance as a function of time for DASA 2 for the forward and back photoswitching reactions in chloroform (2% DMSO), 10  $\mu$ M.

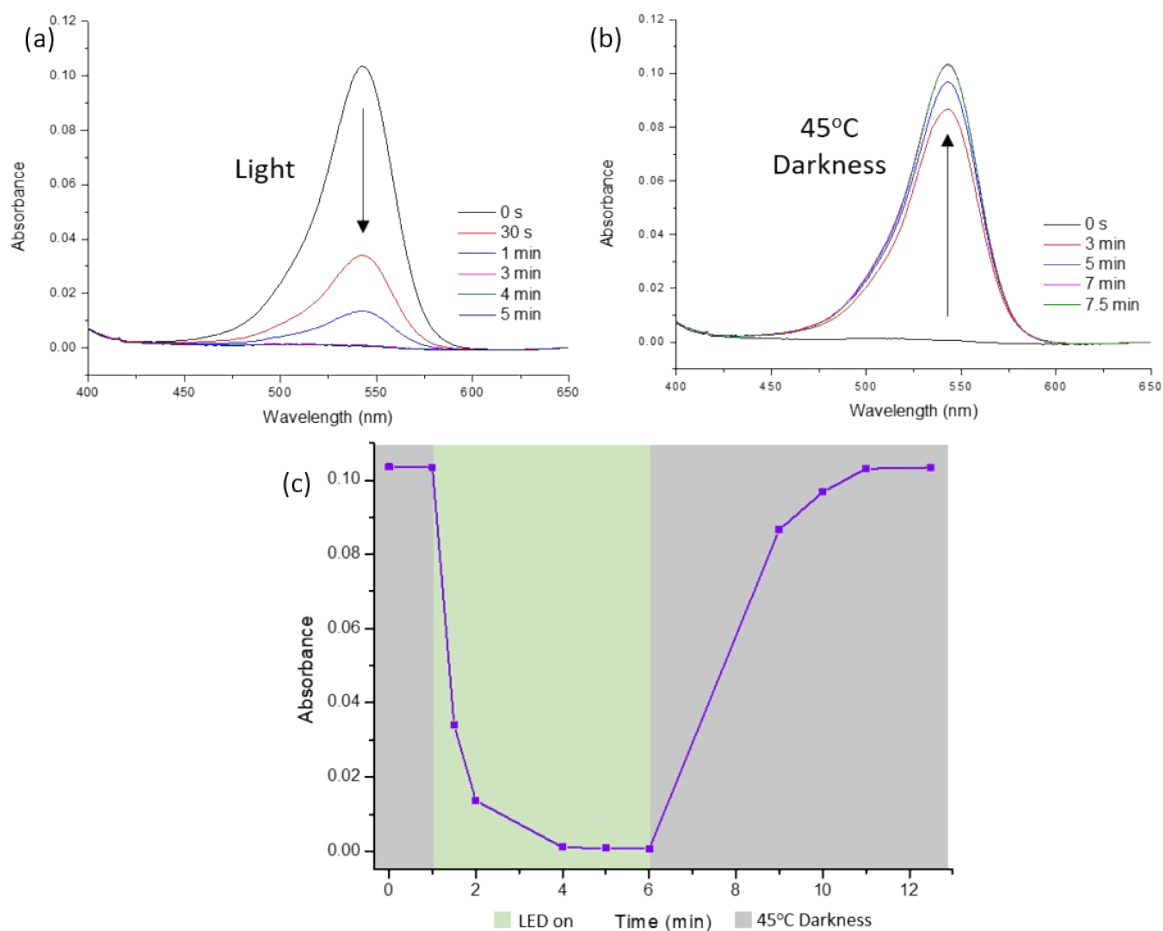

Figure S7. Absorption spectra for DASA 2 in pure chloroform at 100  $\mu$ M ( $1 \times 10^{-4}$  M). (a) Spectrum of the isomerisation from the linear to cyclized forms. (b) Spectrum of the reverse reaction from cyclized to linear. (c) Plot displaying absorbance as a function of time.

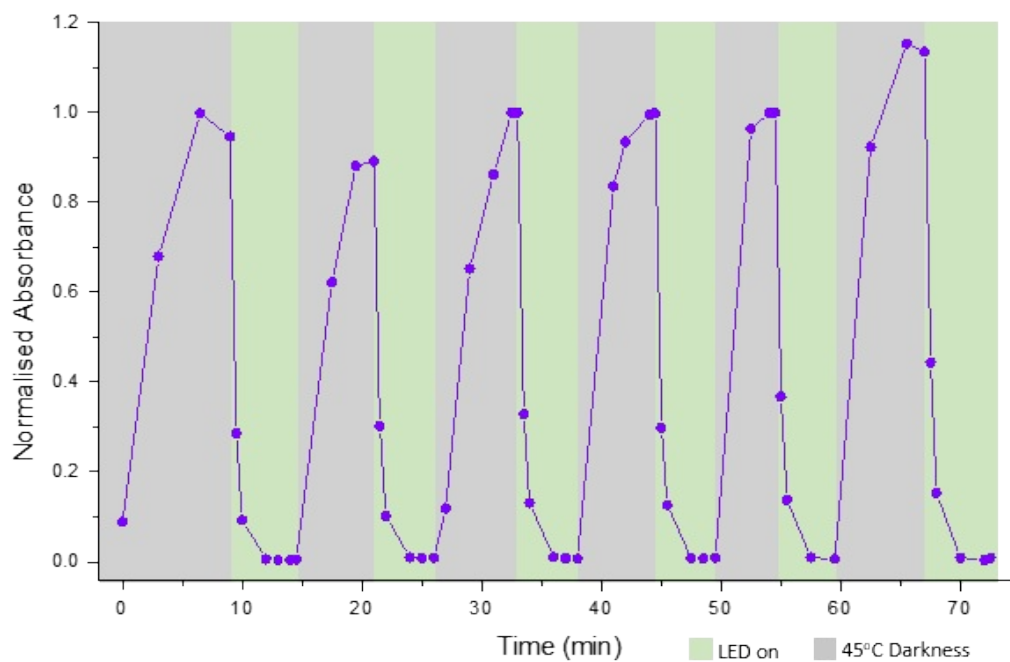

Figure S8. Absorption spectrum for DASA 2, in chloroform (2% DMSO), 100  $\mu\text{M}$  ( $1 \times 10^{-4}$  M). Normalized absorbance plotted as a function of time over multiple photoswitching cycles. Minor variation in the irradiation time and recovery of absorbance are due to slight changes in the temperature of the oven used to heat the samples over multiple cycles. The piperazine based DASAs showed more temperature sensitive behaviour than others with changes of  $>2$   $^{\circ}\text{C}$  resulting in changes in the absorbance.



### 1.3 UV-Vis spectroscopy data for DASA 3

Individual absorption spectra for DASA 3 in chloroform (2% DMSO) at each concentration reported. These spectra correspond with the data displayed in fig. 2 in the main text.

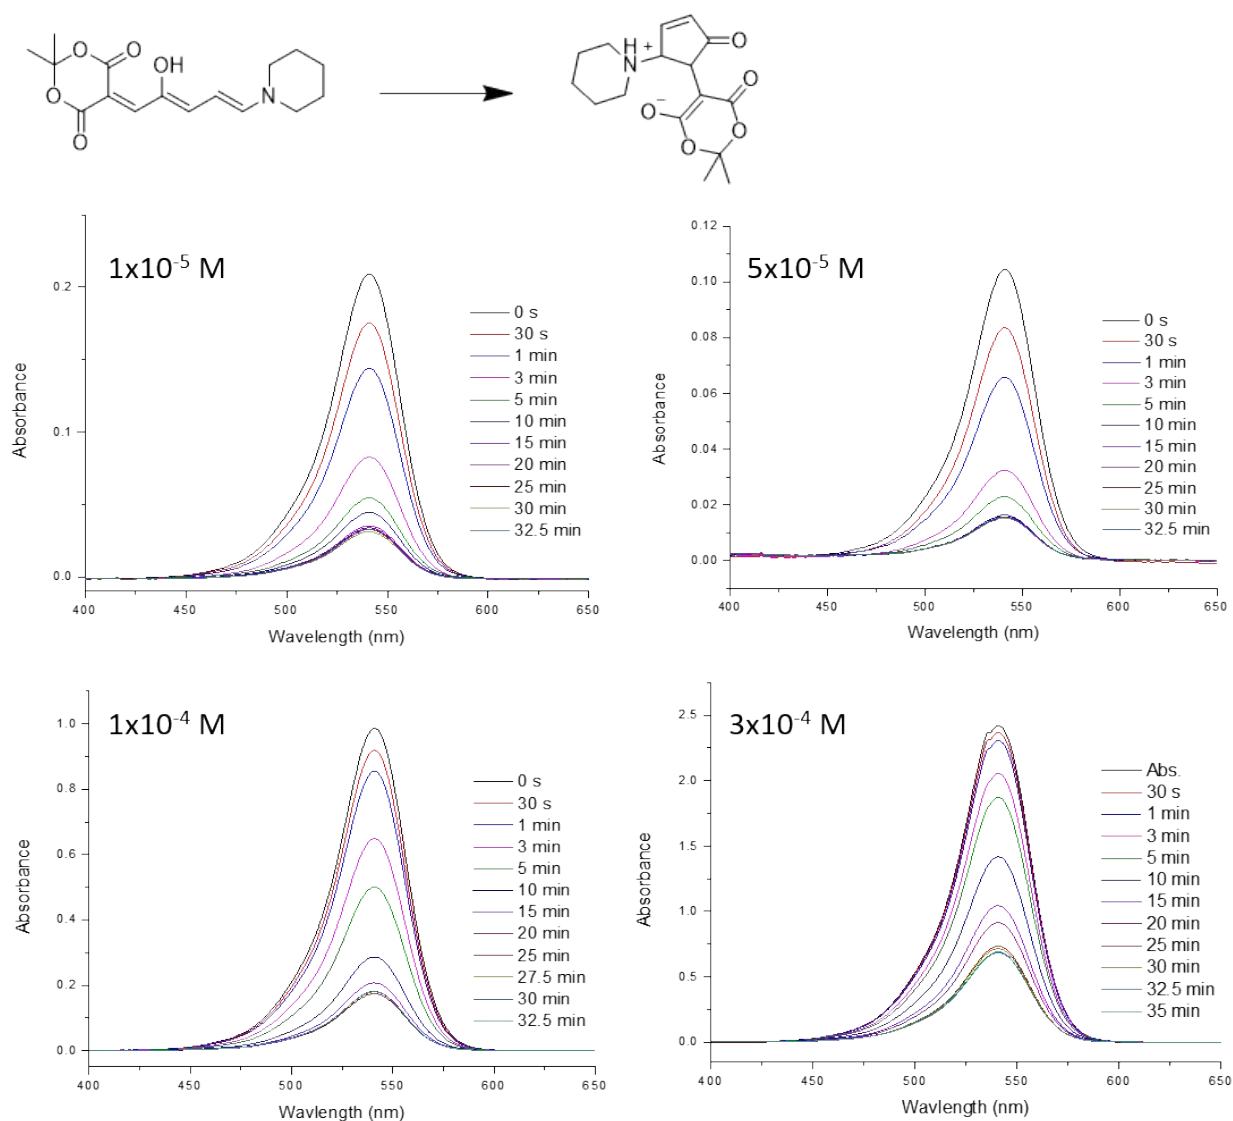

Figure S9. Absorption spectra for DASA 3 in chloroform (2% DMSO) at each concentration reported.

## 1.4 UV-Vis Spectroscopy data for DASA 4

Individual absorption spectra for DASA 4 in chloroform (2% DMSO) at each concentration reported. These spectra correspond with the data displayed in fig. 2 in the main text.

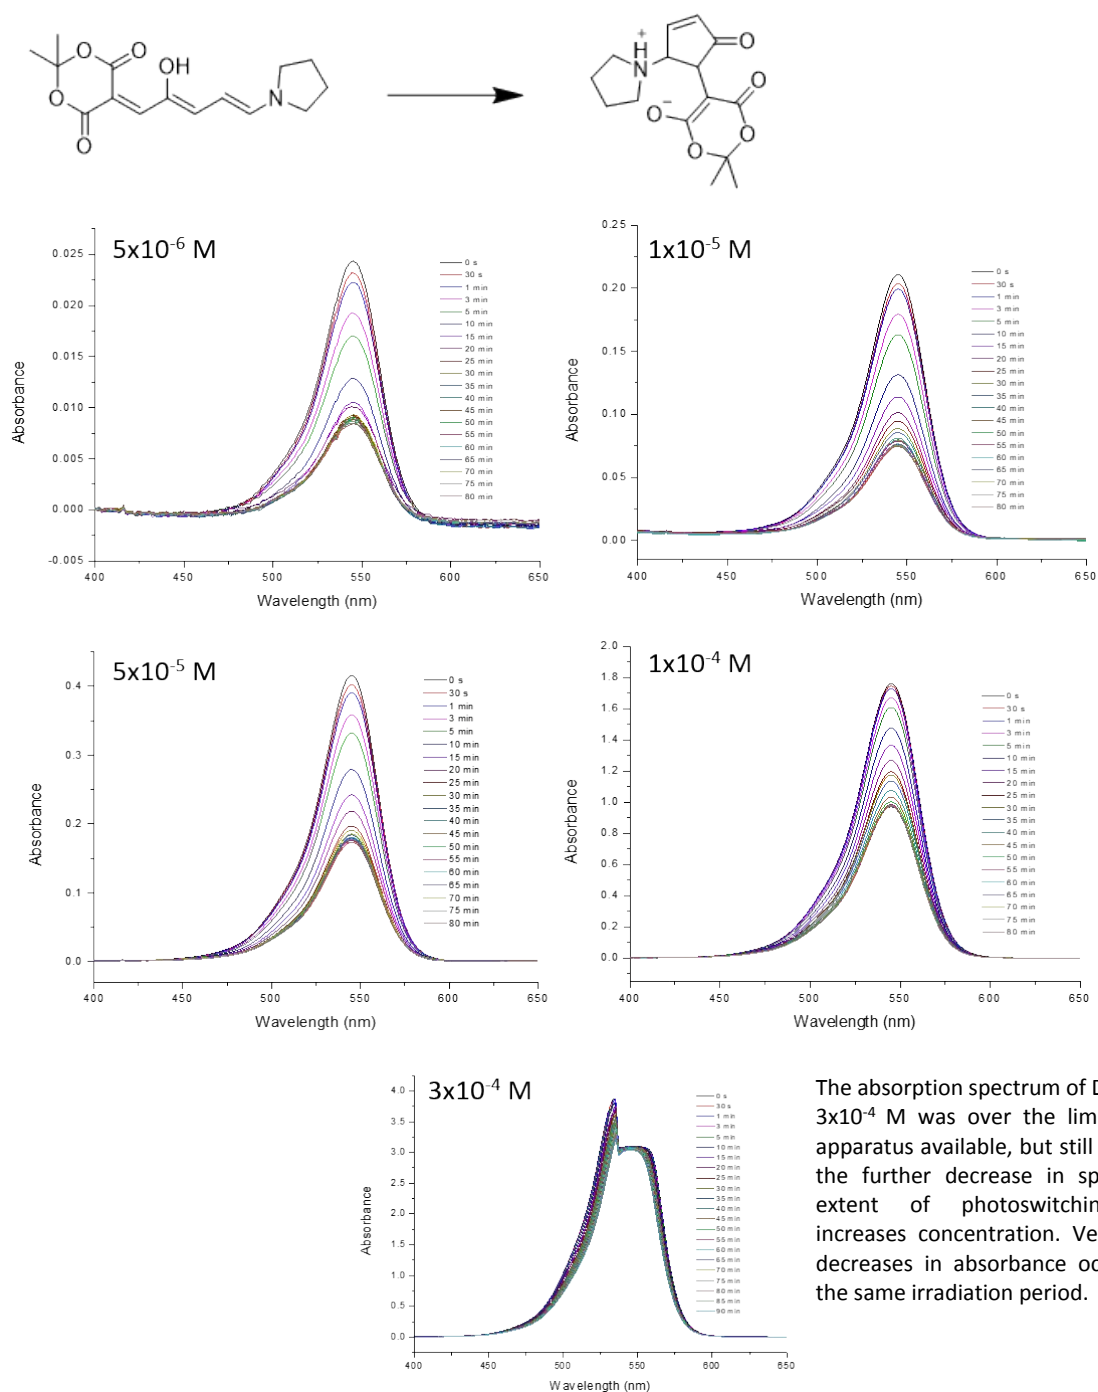

The absorption spectrum of DASA 3 at  $3 \times 10^{-4}$  M was over the limit of the apparatus available, but still indicates the further decrease in speed and extent of photoswitching with increases concentration. Very minor decreases in absorbance occur over the same irradiation period.

Figure S10. Absorption spectra for DASA 3 in chloroform (2% DMSO) at each concentration reported.

## 1.5 DASAs 3 and 4 photoswitching with Piperazine

In an effort to establish if the differences observed in concentration dependence could be attributed to the basicity of the Piperazine moiety, one equivalent of Piperazine was added to solutions of DASAs **3** and **4**. No changes to the extent of photoswitching (loss in absorbance at the PSS) were observed for either molecule. DASA **3** displayed identical switching behavior in both the presence and absence of 1 equiv. Piperazine, as shown in fig S11a, b. However, in the case of DASA **4**, the rate of photoswitching appeared to be slowed in the presence of Piperazine, and only 95% recovery of the absorbance was achieved, with no additional loss in absorbance upon irradiation, see fig S11c, d. Thus, inclusion of free Piperazine as an additive will not achieve the same negation of concentration dependence.

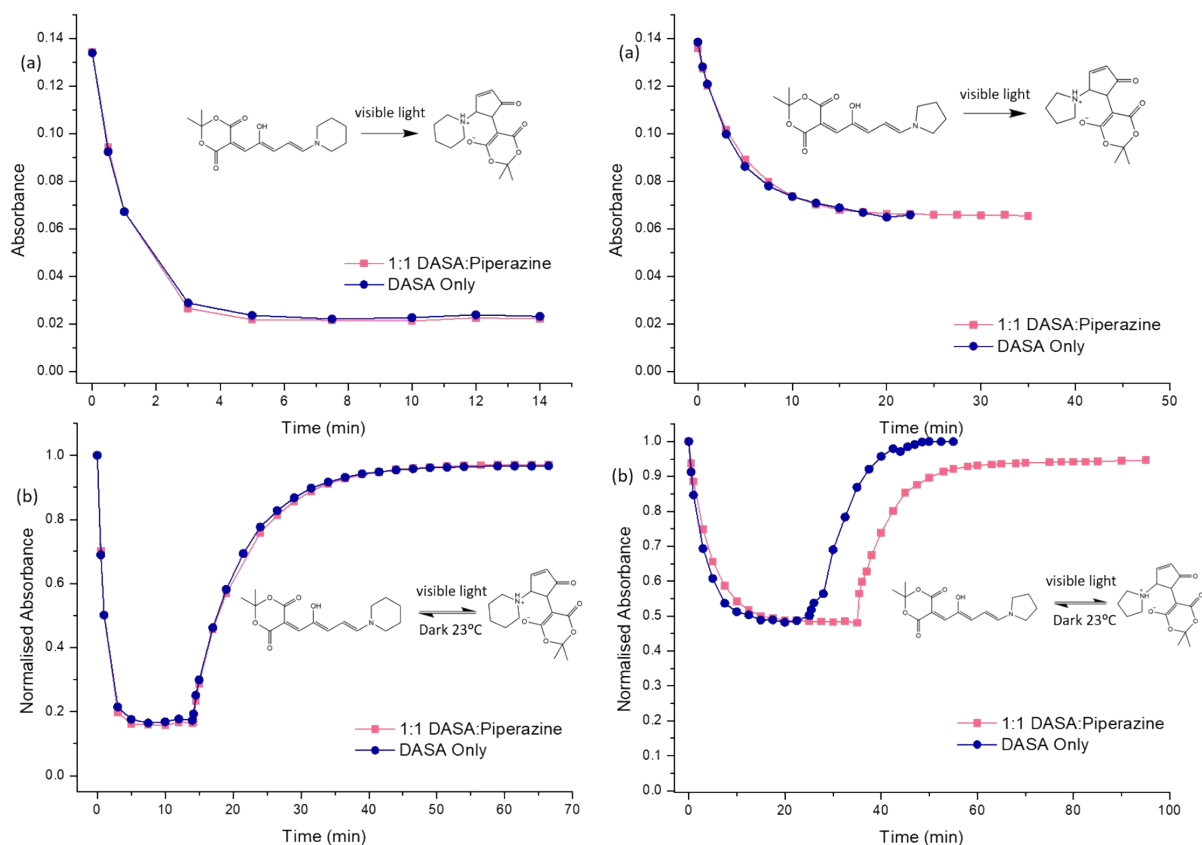

Figure S11. Absorption spectra for DASA 3 and 4 at  $10 \mu\text{M}$  ( $1 \times 10^{-5} \text{M}$ ) in pure chloroform, showing data for solutions with Piperazine at a ratio of 1:1 with the DASA, and with no Piperazine added. (a) Plot of absorbance as a function of time for the isomerisation from the linear to cyclized form of DASA 3. (b) Plot of normalised as a function of time for the forward and reverse photoswitching process for DASA 3. (c) Plot of absorbance as a function of time for the isomerisation from the linear to cyclized form of DASA 4. (d) Plot of normalised as a function of time for the forward and reverse photoswitching process for DASA 4.

## 1.6 UV-Vis spectroscopy for DASA 5

Photoswitching of a diethyl amine based DASA for an example of a first generation DASA which undergoes very little photoswitching in chloroform, even in dilute solutions, after an extended period of irradiation from visible light. The reverse reaction of the photoswitching process is also shown, demonstrating the inefficiency of the reversibility of simple first generation DASAs.

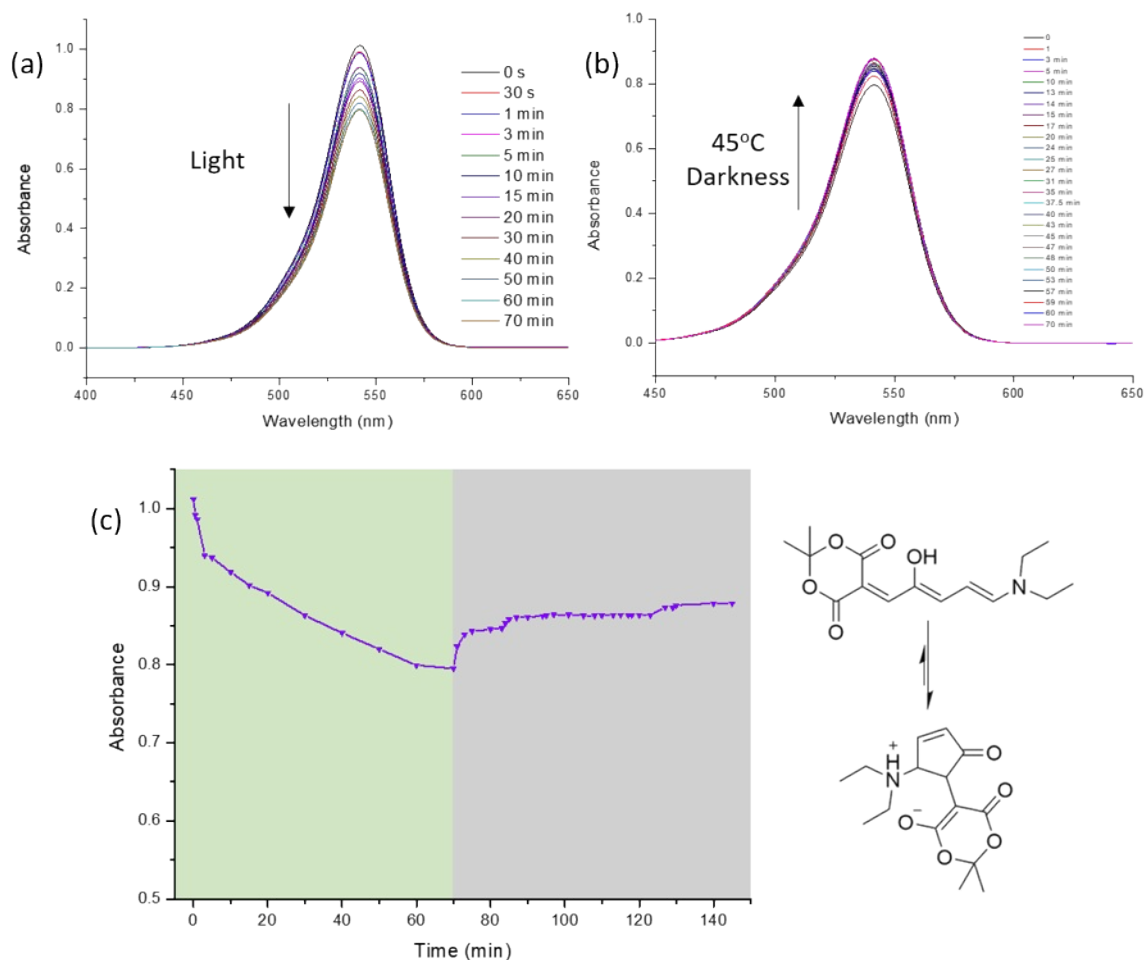

Figure S12. Absorption spectra for DASA 5 in pure chloroform at 60  $\mu\text{M}$  ( $6 \times 10^{-5} \text{ M}$ ). (a) Spectrum of the isomerisation from the linear to cyclized forms. (b) Spectrum of the reverse reaction from cyclized to linear. (c) Plot displaying absorbance as a function.

## 2 Synthetic Methods

All commercially obtained solvents and reagents were used without further purification.

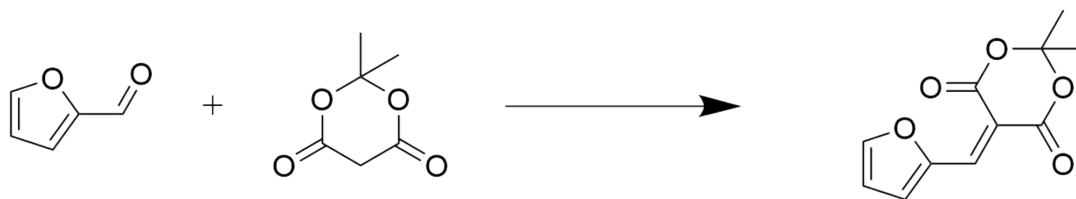

**5-[(furan-2-yl)methylidene]-2,2-dimethyl-1,3-dioxane-4,6-dione:** Prepared according to the literature procedure.<sup>1</sup> Meldrum's acid (10 mmol, 1.44 g) and furfural (10 mmol, 0.961 g) were mixed in water (30 mL) followed by heating to 70 °C and stirring for 2 hours. The solid obtained was filtered, vacuum dried and dissolved in dichloromethane (30 mL) followed by washing sequentially with saturated NaHSO<sub>3</sub> (30 mL), water (30 mL), NaHCO<sub>3</sub> (30 mL), and brine solution (30 mL). The organic layer was then dried over MgSO<sub>4</sub>, filtered, and the solvent removed via rotary evaporation, yielding a yellow powder (1.4 g, 63%). <sup>1</sup>H NMR (400 MHz, CDCl<sub>3</sub>): δ 8.46 (d, *J* = 3.9 Hz, 1H), 8.36 (s, 1H), 7.85 (dd, *J* = 0.5, 1.1 Hz, 1H) 6.75 (dq, *J* = 3.9, 0.7 Hz, 1H) 1.77 (s, 6H). <sup>13</sup>C NMR (100 MHz, 298 K, CDCl<sub>3</sub>): δ 163.24, 160.1, 150.39, 150.24, 141.23, 128.09, 115.27, 107.57, 104.51, 27.57.

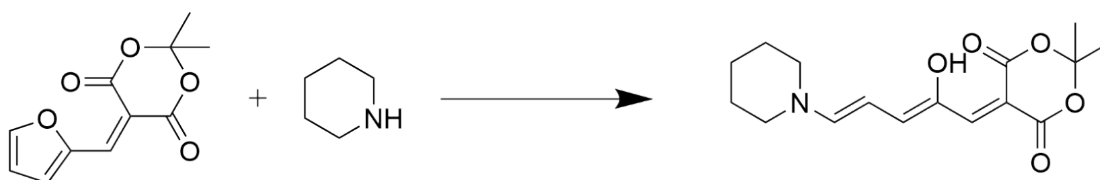

(DASA

3)

**5-[(2Z,4E)-2-hydroxy-5-(piperidin-1-yl)penta-2,4-dien-1-ylidene]-2,2-dimethyl-1,3-dioxane-4,6-dione:** DASA **3** was prepared by literature procedure.<sup>1</sup>

5-[(furan-2-yl)methylidene]-2,2-dimethyl-1,3-dioxane-4,6-dione (0.3 g, 1.35 mmol) was dissolved in THF (5 mL) and left to stir. Piperidine (0.1149 g, 1.3 mmol) was added via micropipette, the reaction was left to stir at room temperature (23 °C) for 1 h followed by cooling to 0 °C for 20 min. The mixture was filtered and the resultant solid was washed with diethyl ether and further dried under vacuum yielding a red powder (0.3303 g, 79%). <sup>1</sup>H NMR (400 MHz CD<sub>2</sub>Cl<sub>2</sub>): δ 11.30 (s, 1H), 7.23 (d, *J* = 12.17 Hz, 1H), 6.84 (s, 1H), 6.74 (dd, *J* = 1.35, 12.42 Hz, 1H), 6.05 (t, *J* = 12.3 Hz, 1H), 3.47-3.51 (m, 4H), 1.67 (s, 6H), 1.59 (s, 6H). <sup>1</sup>H NMR (400 MHz DMSO-*d*<sub>6</sub>): δ 11.38 (s, 1H), 8.0 (d, *J* = 11.6, 1H), 7.11 (d, *J* = 11.6, 1H), 6.54 (s, 1H), 6.22 (t, *J* = 12.3), 3.71 (m, 4H), 1.67 (s, 6H), 1.58 (s, 6H). <sup>13</sup>C NMR (100 MHz, 298 K, DMSO-*d*<sub>6</sub>): δ 161.88, 154.49, 143.53, 130.12, 104.98, 102.55, 85.24, 57.21, 48.55, 26.95, 26.46, 26.00, 23.35. LC-MS (ESI+) *m/z* 308.1, calculated [M+H]<sup>+</sup> [C<sub>16</sub>H<sub>21</sub>NO<sub>5</sub>+H]<sup>+</sup> = 308.14.

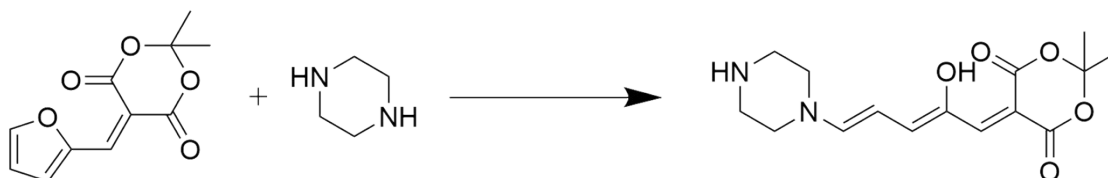

(DASA **2**) **5-[(2Z,4E)-2-hydroxy-5-(piperazin-1-yl)penta-2,4-dien-1-ylidene]-2,2-dimethyl-1,3-dioxane-4,6-** (2): 5-[(furan-2-yl)methylidene]-2,2-dimethyl-1,3-dioxane-4,6-dione (0.5554 g, 2.5 mmol) was dissolved in chloroform (5 mL). To this solution piperazine (0.1895 g, 2.2 mmol) was added. The reaction mixture was stirred for 1 h, followed by cooling to 0 °C for 20 min. The mixture was filtered and the resultant solid was washed with diethyl ether and further dried under vacuum yielding

a dark purple powder (0.5833 g, 86%).  $^1\text{H}$  NMR (400 MHz DMSO- $d_6$ ):  $\delta$  8.41 (s, 2H), 7.50 (dd,  $J$  = 5.77, 1.95 Hz, 1H), 6.20 (dd,  $J$  = 5.97, 1.83 Hz, 1H), 3.90 (d,  $J$  = 2.43 Hz, 1H), 3.14 (d,  $J$  = 2.9 Hz, 1H), 3.08 (t,  $J$  = 4.5 Hz, 4H), 2.66 – 2.76 (m, 4H), 1.48 (s, 6H).  $^{13}\text{C}$  NMR (100 MHz, 298 K, DMSO- $d_6$ ):  $\delta$  209.19, 160.47, 134.95, 99.95, 71.98, 71.71, 46.71, 44.89, 43.80, 40.65, 26.43, 26.63. LC-MS (ESI+)  $m/z$  309, calculated  $[\text{M}+\text{H}]^+ [\text{C}_{15}\text{H}_{20}\text{NO}_5+\text{H}]^+ = 309.14$ .

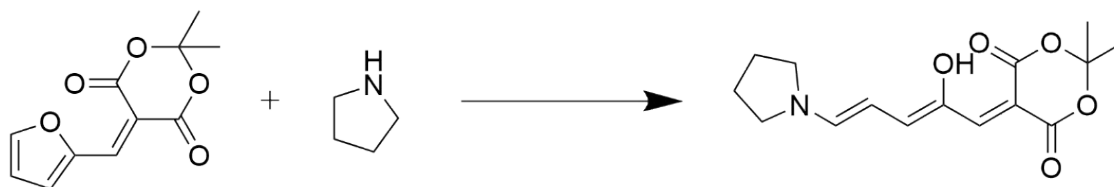

**(DASA 4) 5-((2Z,4E)-2-Hydroxy-5-(pyrrolidin-1-yl)penta-2,4-dien-1-ylidene)-2,2-dimethyl-1,3-dioxane-4,6-dione:** DASA 4 was prepared by literature procedure.<sup>1</sup> 5-[(furan-2-yl)methylidene]-2,2-dimethyl-1,3-dioxane-4,6-dione (0.3 g, 1.35 mmol) was dissolved in THF (5 mL) and left to stir. Pyrrolidine (0.091g, 1.3 mmol) was added via micropipette, the reaction was left to stir at room temperature (23 °C) for 30 min followed by cooling to 0 °C for 20 min. The mixture was filtered and the resultant solid was washed with diethyl ether and further dried under vacuum yielding a red powder (0.2928 g, 77%).  $^1\text{H}$  NMR (400 MHz  $\text{CDCl}_3$ )  $\delta$  11.41 (s, 1H), 7.42 (d,  $J$  = 12.30 Hz, 1H), 7.08 (s, 1H), 6.69 (d,  $J$  = 11.57 Hz, 1H), 5.96 (t,  $J$  = 12.3 Hz, 1H), 3.71 (m, 2H), 3.51 (m, 2H), 2.03-2.15 (m, 4H), 1.72 (s, 6H).  $^{13}\text{C}$  NMR (100 MHz, 298 K,  $\text{CDCl}_3$ ):  $\delta$  166.05, 164.24, 152.91, 149.15, 144.06, 138.65, 102.39, 89.88, 52.80, 47.41, 25.68, 24.00. LC-MS (ESI+)  $m/z$  294.1, calculated  $[\text{M}+\text{H}]^+ [\text{C}_{15}\text{H}_{19}\text{NO}_5+\text{H}]^+ = 294.13$ .

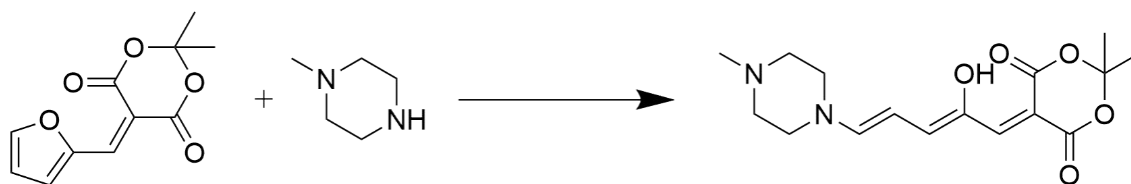

**(DASA 1) 5-((2Z,4E)-2-hydroxy-5-(4-methylpiperazin-1-yl)penta-2,4-dien-1-ylidene)-2,2-dimethyl-1,3-dioxane-4,6-dione (1):** 5-[(furan-2-yl)methylidene]-2,2-dimethyl-1,3-dioxane-4,6-dione (0.3 g, 1.35 mmol) was dissolved in minimal THF ( $\approx$  5 mL). To this solution methyl piperazine (0.13 g, 1.3 mmol) was added. The reaction mixture was stirred for 1.5 h, followed by cooling to 0 °C for 20 min. The mixture was filtered and the resultant solid was washed with diethyl ether and further dried under vacuum yielding a crystalline magenta powder (0.2813 g, 67%).  $^1\text{H}$  NMR (400 MHz  $\text{CDCl}_3$ )  $\delta$  11.38 (s, 1H), 7.17 (d,  $J$  = 12.42, 1H), 7.13 (s, 1H), 6.71 (d,  $J$  = 12.3 Hz, 1H), 6.08 (t,  $J$  = 12.3 Hz, 1H), 3.59 (s, 4H), 2.54 (s, 4H), 2.36 (s, 3H), 1.72 (s, 6H).

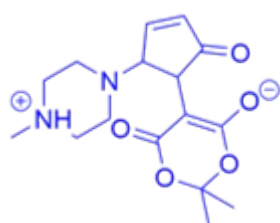

The NMR spectrum of DASA 1 in chloroform exhibits both the cyclopentanone and triene forms. The cyclopentanone isomer is assigned with blue letters to indicate which peaks correspond with which isomer.

$^1\text{H}$  NMR (400 MHz  $\text{CDCl}_3$ )  $\delta$  7.4 (s, 1H) 6.35 (d,  $J = 4.26$  Hz, 1H), 4.52 (s, 1H), 3.38 (m, 3H), 3.04 (m, 2H), 2.87 (m, 4H), 2.54 (s, 3H), 1.65 (s, 1H).

$^1\text{H}$  NMR (400 MHz  $\text{D}_2\text{O}$ )  $\delta$  7.70 (dd,  $J = 6, 2.1$ , 1H), 6.4 (dd,  $J = 6, 1.9$ , 1H), 4.04 (m, 1H), 3.49 (m, 2H), 3.38 (d,  $J = 3$ , 1H), 3.06 - 3.17 (m, 4H), 2.84 (s, 1H), 2.75 (m, 1H), 1.6 (s, 6H).  $^{13}\text{C}$  NMR (100 MHz, 298 K,  $\text{D}_2\text{O}$ ):  $\delta$  212.07, 162.10, 134.79, 103.43, 74.21, 70.64, 53.31, 43.59, 42.77. LC-MS (ESI+)  $m/z$  323, calculated  $[\text{M}+\text{H}]^+$   $[\text{C}_{16}\text{H}_{22}\text{NO}_5+\text{H}]^+ = 332.15$ .

### 3 NMR Spectral Data

The NMR spectra were obtained using a Burkert AV2 400 MHz or AVNEO 400 MHz spectrometer. The data was processed using ACD Labs software. NMR Chemical shift values are reported in parts per million (ppm) and calibrated to the centre of the residual solvent peak set (s = singlet, d = doublet, t = triplet, q = quartet, m = multiplet).

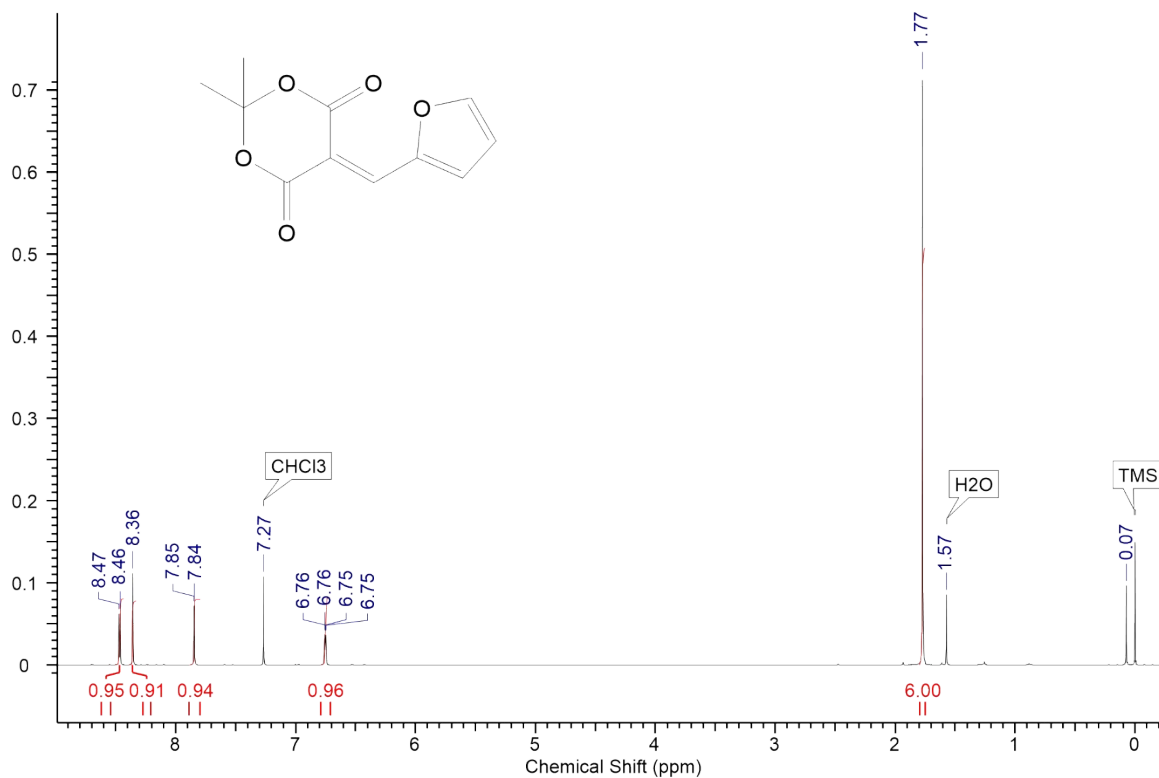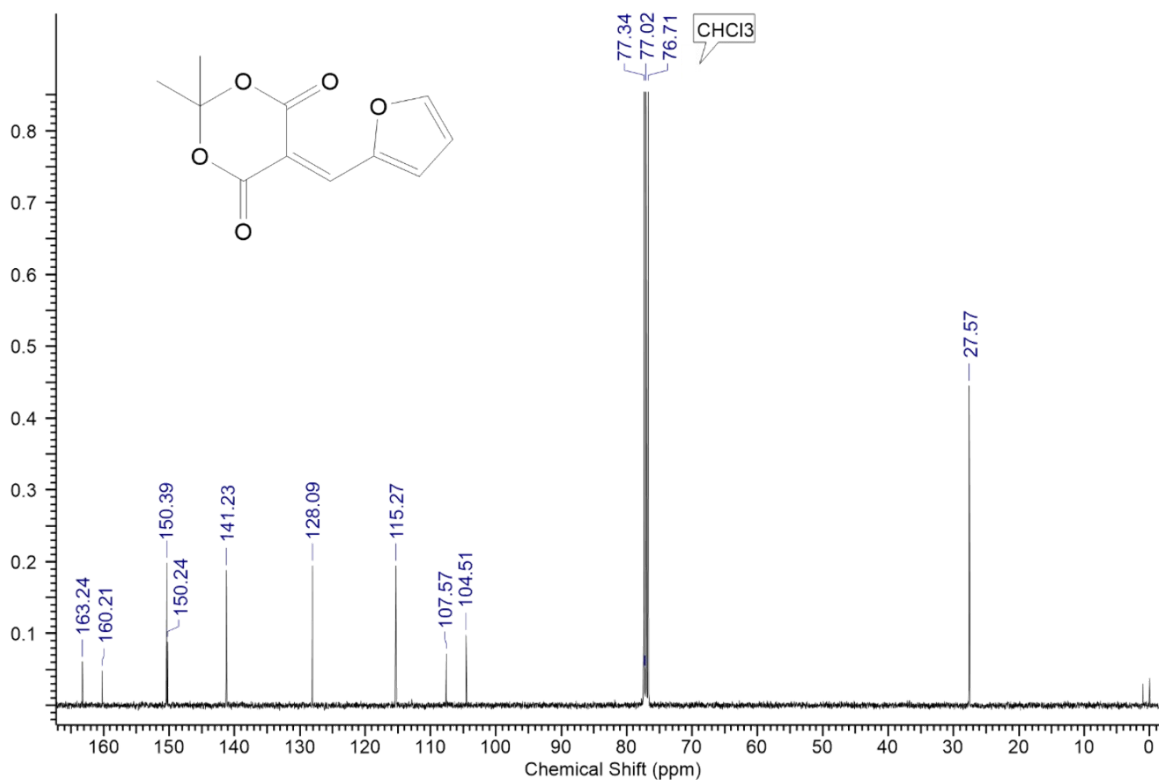



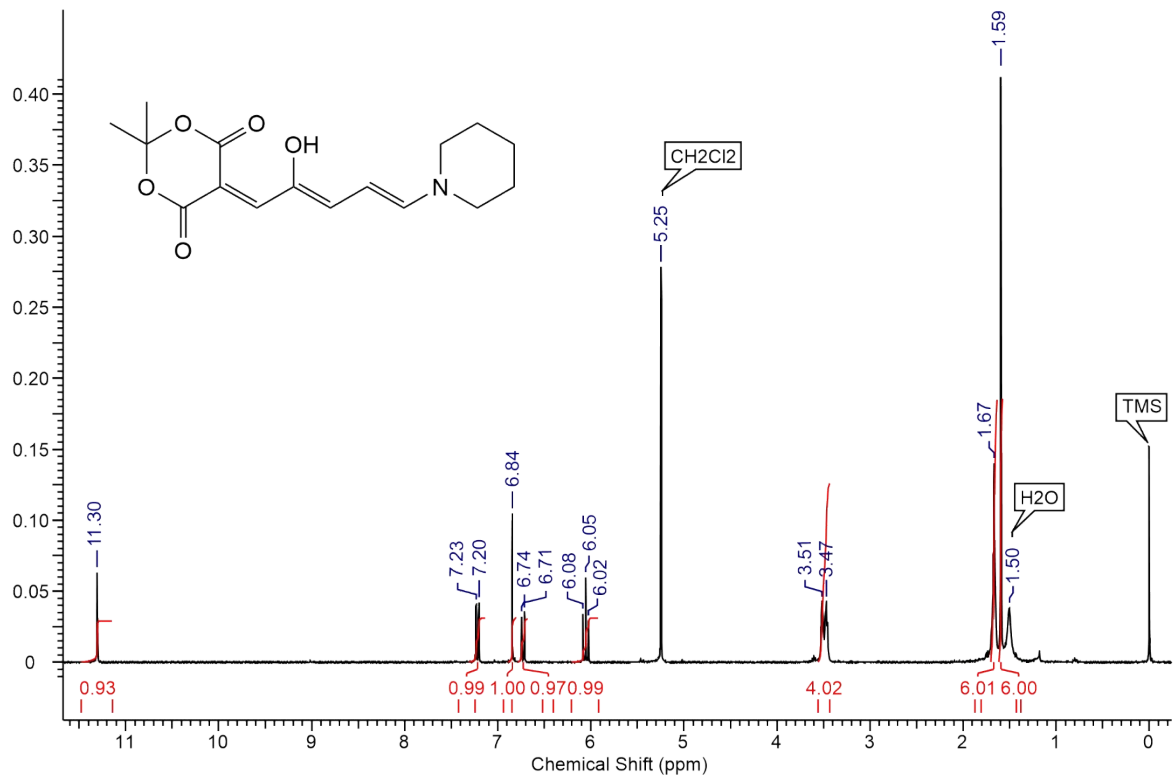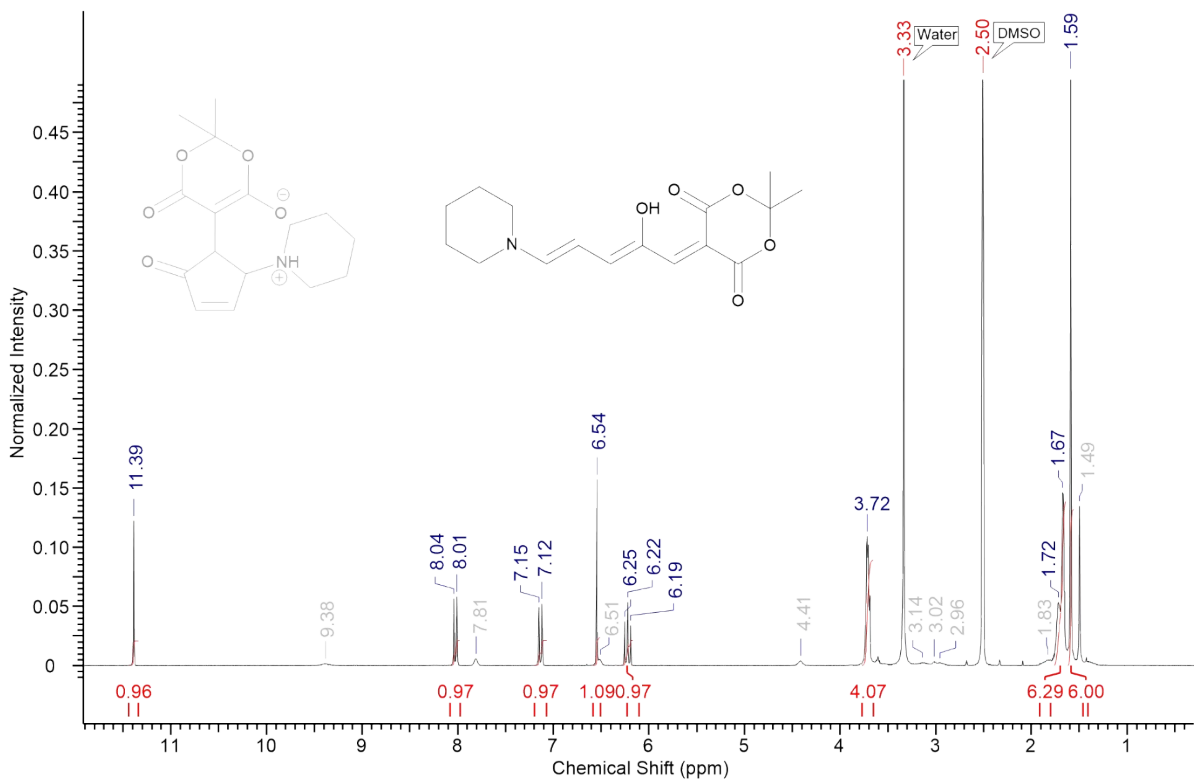

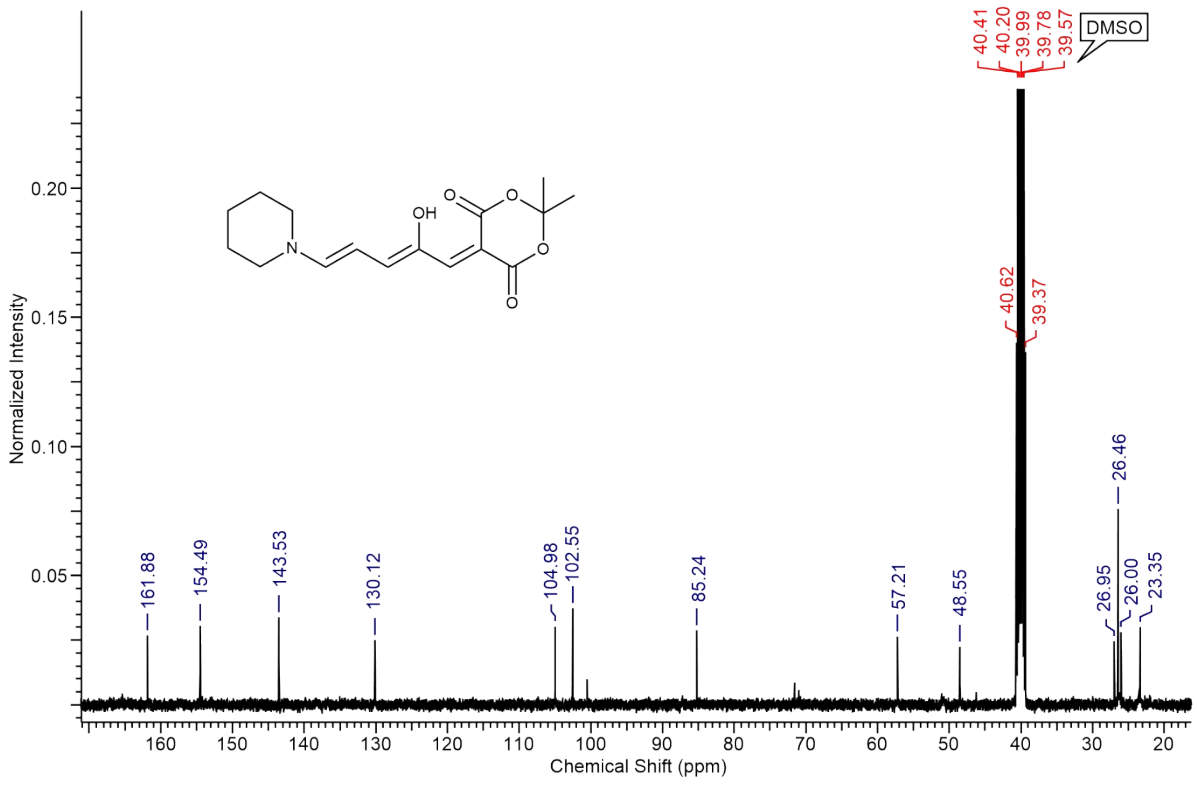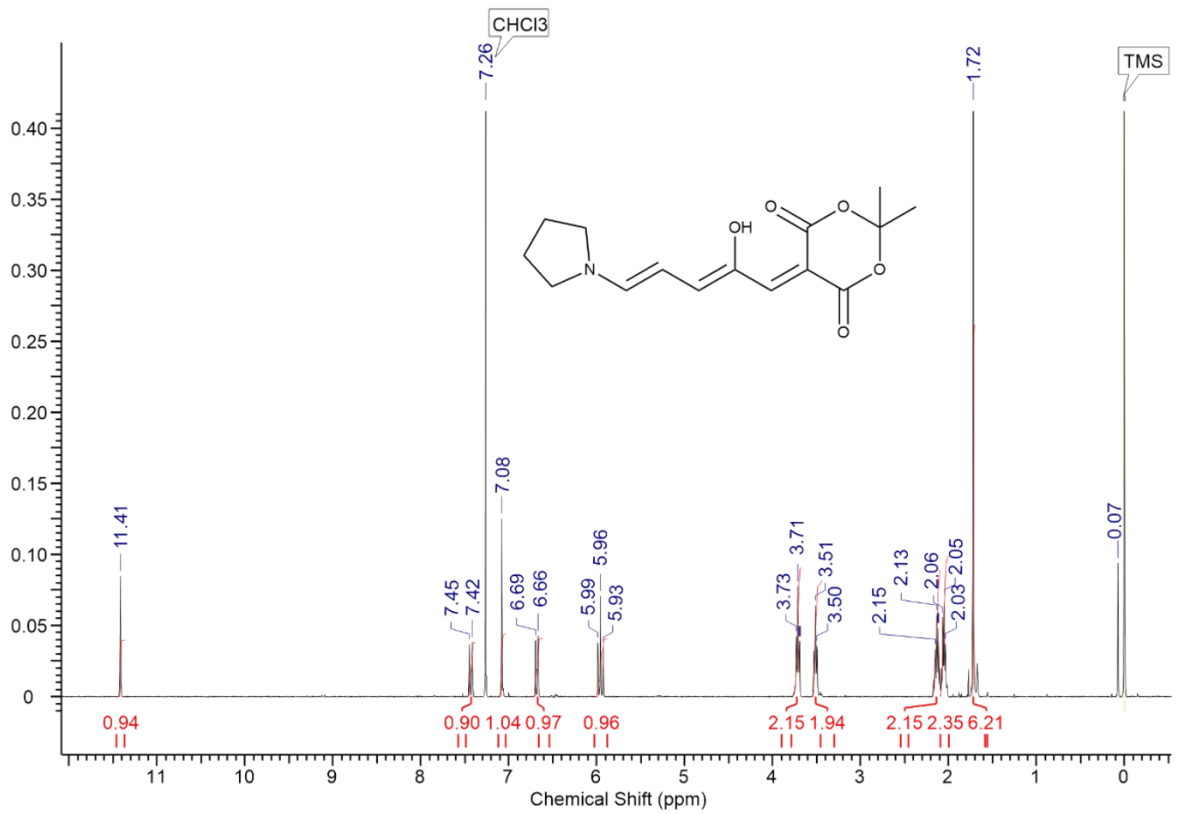

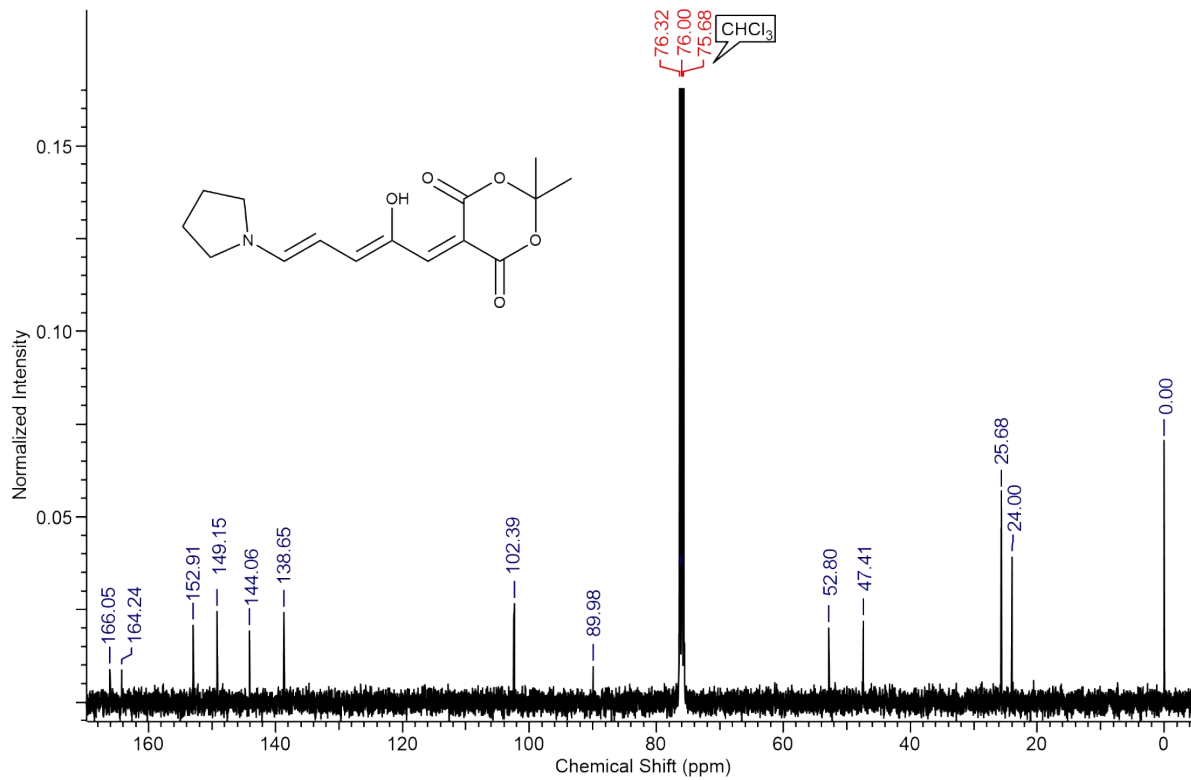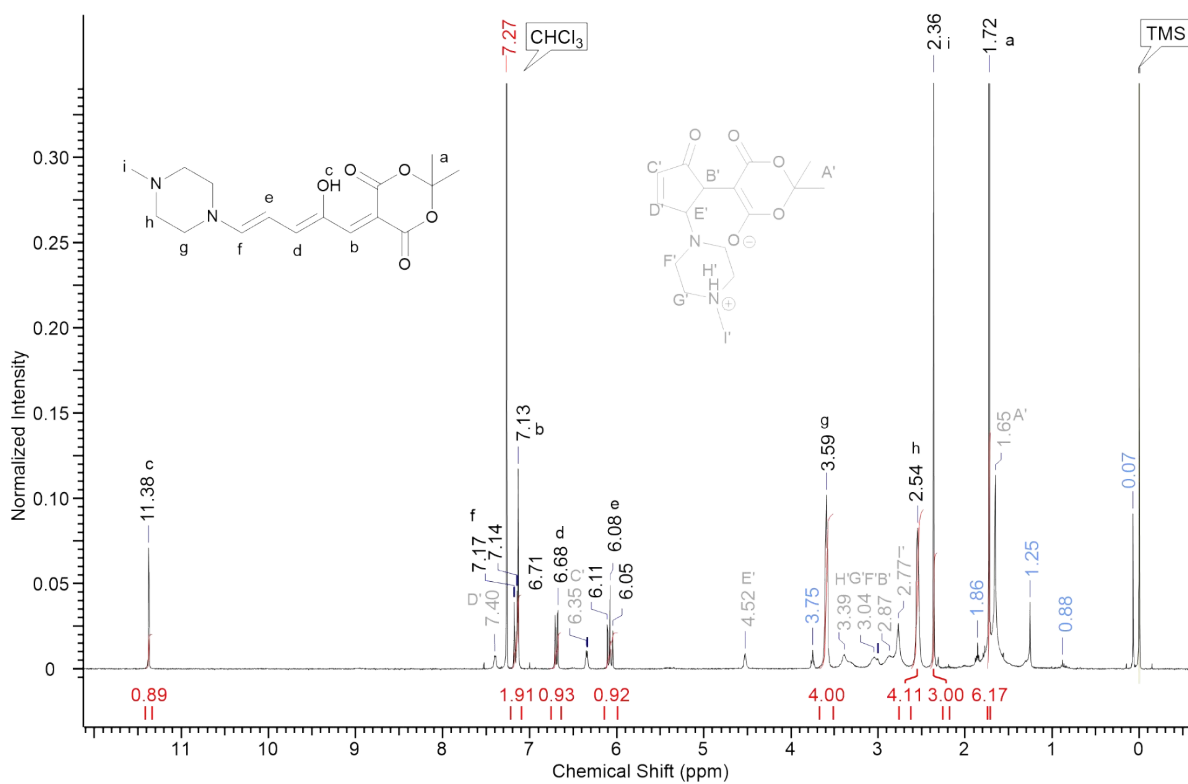

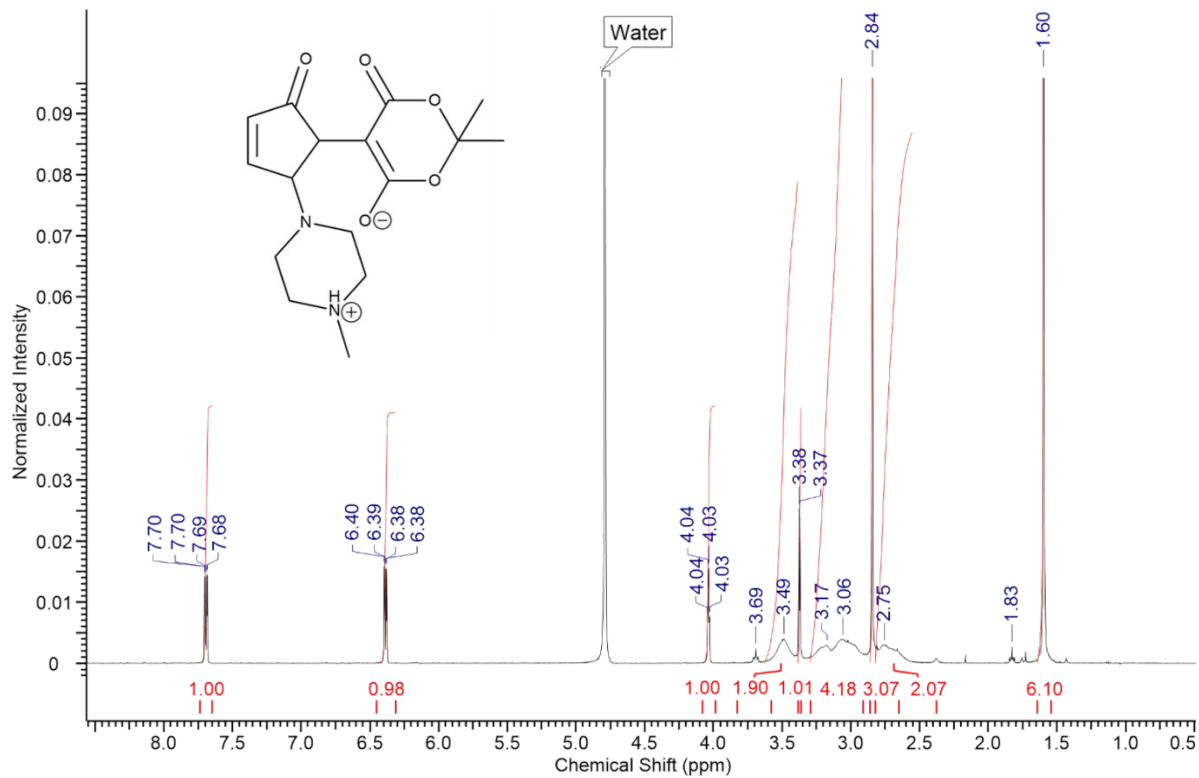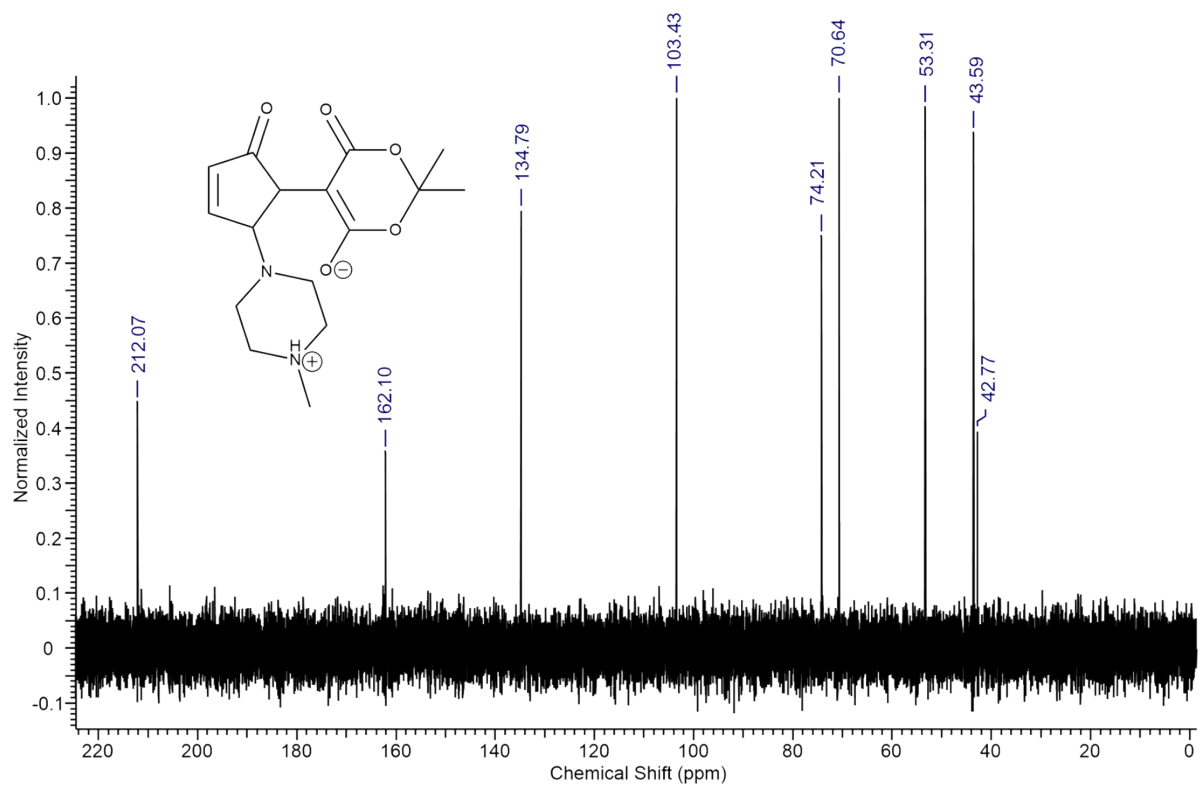

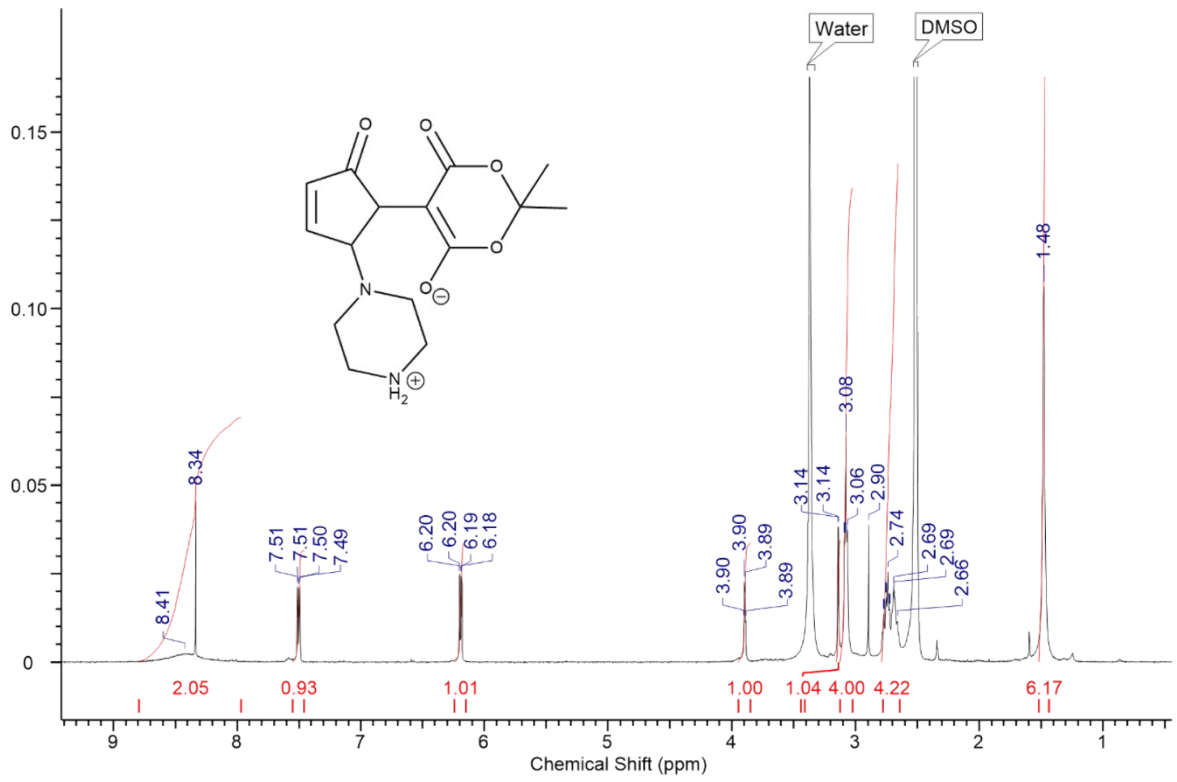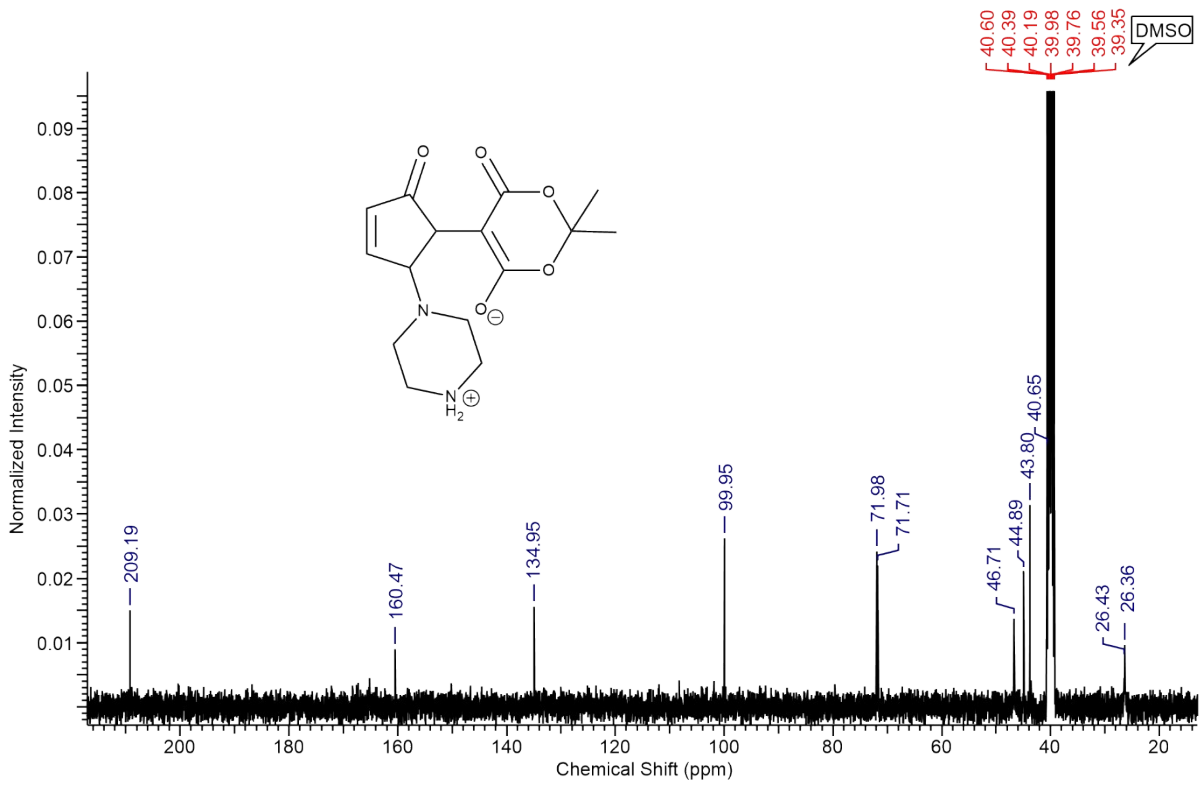

## 4 Single crystal X-ray diffraction (SCXRD)

Single crystal diffraction data were collected using an Oxford Diffraction SuperNova, using Cu K $\alpha$  radiation ( $\lambda = 1.54413 \text{ \AA}$ ) with an AtlasS2 detector. Crystals were kept at 100 K during data collection. Using Olex2,<sup>2</sup> the structures were solved with the ShelXT<sup>3</sup> structure solution program using direct methods and refined with the ShelXL<sup>4</sup> refinement package using least squares minimisation.

### 4.1 DASA 1 (chloroform solvate)

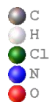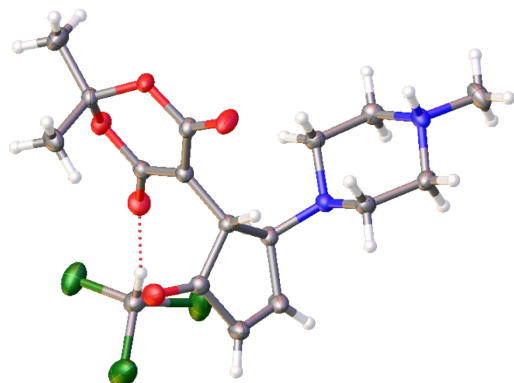

**Crystal Data for DASA 1 (chloroform solvate):**  $(C_{17}H_{23}Cl_3N_2O_5)$  ( $M = 441.72 \text{ g/mol}$ ): triclinic, space group P-1 (no. 2),  $a = 10.0026(7) \text{ \AA}$ ,  $b = 10.1400(9) \text{ \AA}$ ,  $c = 10.8176(10) \text{ \AA}$ ,  $\alpha = 108.089(8)^\circ$ ,  $\beta = 96.421(7)^\circ$ ,  $\gamma = 92.493(6)^\circ$ ,  $V = 1032.86(15) \text{ \AA}^3$ ,  $Z = 2$ ,  $T = 150.00(10) \text{ K}$ ,  $\mu(\text{Cu K}\alpha) = 4.285 \text{ mm}^{-1}$ ,  $D_{\text{calc}} = 1.420 \text{ g/cm}^3$ , 7009 reflections measured ( $8.676^\circ \leq 2\theta \leq 144.132^\circ$ ), 3933 unique ( $R_{\text{int}} = 0.0288$ ,  $R_{\text{sigma}} = 0.0431$ ) which were used in all calculations. The final  $R_1$  was 0.0459 ( $I > 2\sigma(I)$ ) and  $wR_2$  was 0.1138 (all data).

### 4.2 DASA 1 ( $H_2O$ solvate)

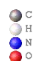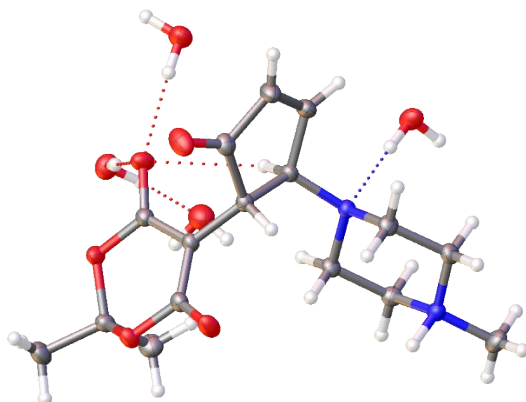

**Crystal Data for DASA 1 ( $H_2O$  solvate):**  $C_{16}H_{30}N_2O_9$  ( $M = 394.42 \text{ g/mol}$ ): monoclinic, space group  $P2_1/n$  (no. 14),  $a = 14.92326(18) \text{ \AA}$ ,  $b = 8.57252(8) \text{ \AA}$ ,  $c = 15.64663(18) \text{ \AA}$ ,  $\beta = 94.0935(11)^\circ$ ,  $V = 1996.57(4) \text{ \AA}^3$ ,  $Z = 4$ ,  $T = 150.00(10) \text{ K}$ ,  $\mu(\text{Cu K}\alpha) = 0.910 \text{ mm}^{-1}$ ,  $D_{\text{calc}} = 1.312 \text{ g/cm}^3$ , 11588 reflections measured ( $7.91^\circ \leq 2\theta \leq 143.974^\circ$ ), 3862 unique ( $R_{\text{int}} = 0.0205$ ,  $R_{\text{sigma}} = 0.0183$ ) which were used in all calculations. The final  $R_1$  was 0.0344 ( $I > 2\sigma(I)$ ) and  $wR_2$  was 0.1325 (all data).

### 4.3 DASA 2 (H<sub>2</sub>O solvate)

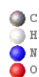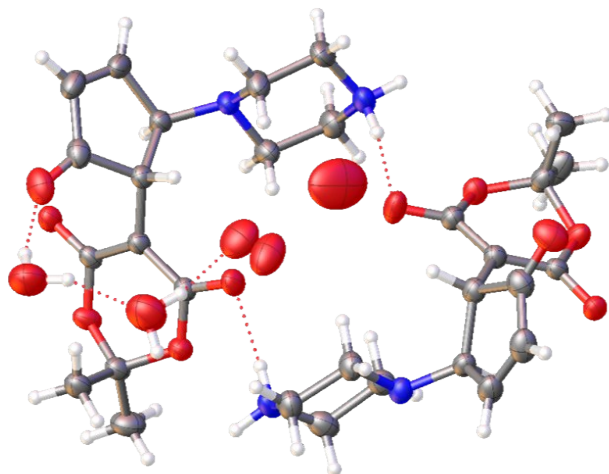

**Crystal Data DASA 2 (H<sub>2</sub>O solvate):** C<sub>30</sub>H<sub>44</sub>N<sub>4</sub>O<sub>13.5</sub> (*M* = 676.69 g/mol): monoclinic, space group *I*2/a (no. 15), *a* = 18.9606(2) Å, *b* = 14.2438(2) Å, *c* = 25.8792(3) Å, *β* = 90.0200(10)°, *V* = 6989.22(15) Å<sup>3</sup>, *Z* = 8, *T* = 200(2) K, *μ*(Cu Kα) = 0.861 mm<sup>-1</sup>, *D*<sub>calc</sub> = 1.286 g/cm<sup>3</sup>, 25753 reflections measured (7.084° ≤ 2 $\theta$  ≤ 146.786°), 6929 unique (*R*<sub>int</sub> = 0.0334, *R*<sub>sigma</sub> = 0.0261) which were used in all calculations. The final *R*<sub>1</sub> was 0.0462 (*I* > 2 $\sigma$ (*I*)) and *wR*<sub>2</sub> was 0.1270 (all data).

### 4.4 DASA 4

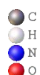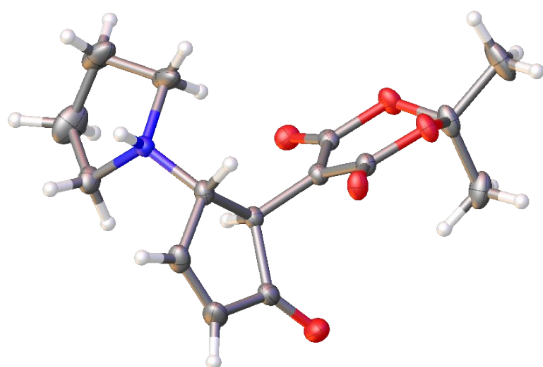

**Crystal Data for DASA 4:** C<sub>15</sub>H<sub>19</sub>NO<sub>5</sub> (*M* = 293.31 g/mol): monoclinic, space group *P*2<sub>1</sub>/*n* (no. 14), *a* = 7.9743(4) Å, *b* = 17.9548(7) Å, *c* = 10.8807(4) Å, *β* = 108.121(4)°, *V* = 1480.60(11) Å<sup>3</sup>, *Z* = 4, *T* = 150(1) K, *μ*(Cu Kα) = 0.825 mm<sup>-1</sup>, *D*<sub>calc</sub> = 1.316 g/cm<sup>3</sup>, 5777 reflections measured (9.852° ≤ 2 $\theta$  ≤ 143.996°), 2826 unique (*R*<sub>int</sub> = 0.0402, *R*<sub>sigma</sub> = 0.0489) which were used in all calculations. The final *R*<sub>1</sub> was 0.0415 (*I* > 2 $\sigma$ (*I*)) and *wR*<sub>2</sub> was 0.1314 (all data).

## 4.5 Extended Crystal Packing

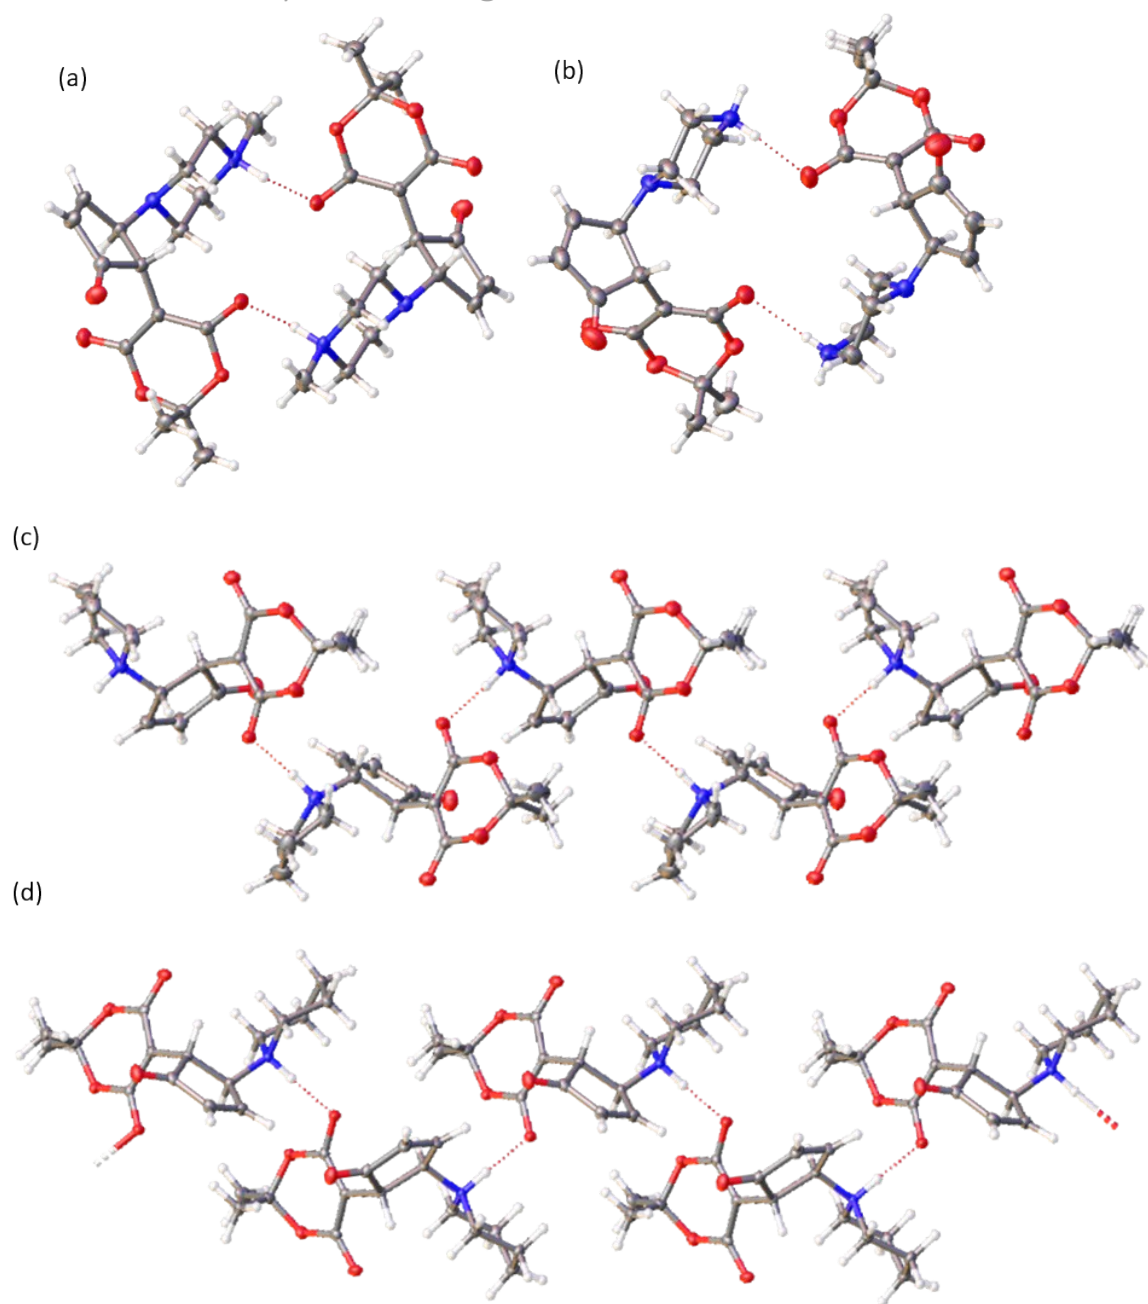

Figure S13. (a) Image from crystal structure of DASA 2 displaying dimer formed. (b) Image from crystal structure of DASA 1 displaying dimer formed. (c) Image from crystal structure of DASA 4 displaying chains formed in the extended lattice. (d) Image from crystal structure of DASA 3 displaying chains formed in the extended lattice.



## 5 Computational experiments

The initial minimum energy conformations of all molecules were assessed following extensive conformational searches and energy minimisations using the intrinsic molecular dynamics MM2 force field intrinsic to Chem3D, v15.0 (Perkin Elmer). All final conformations were modelled at the semi-empirical PM7 level (in CHCl<sub>3</sub>, e=4.81, COSMO) using MOPAC2016<sup>5</sup> through the MOPAC Interface with Chem3D, v15.0 (Perkin Elmer). A typical input is as shown below. The co-ordinates for all minimum energy conformations are given below.

PM7 CHARGE=0 EF EPS=4.81 GNORM=0.0001 LET SHIFT=80

DASA3\_Linear\_M#1

|   |            |           |           |
|---|------------|-----------|-----------|
| C | -11.0700 1 | 0.1166 1  | 3.7822 1  |
| C | -9.9572 1  | -0.3647 1 | 4.7191 1  |
| C | -8.6857 1  | 0.4775 1  | 4.5267 1  |
| N | -8.2756 1  | 0.4478 1  | 3.1087 1  |
| C | -9.3063 1  | 0.9467 1  | 2.1821 1  |
| C | -10.5852 1 | 0.1067 1  | 2.3295 1  |
| C | -7.1366 1  | -0.1127 1 | 2.7364 1  |
| C | -6.6961 1  | -0.2341 1 | 1.3994 1  |
| C | -5.5008 1  | -0.8378 1 | 1.0911 1  |
| C | -5.0443 1  | -0.9959 1 | -0.2432 1 |
| C | -3.8762 1  | -1.6613 1 | -0.5379 1 |
| C | -3.2605 1  | -1.9730 1 | -1.7624 1 |
| C | -3.7850 1  | -1.7503 1 | -3.0691 1 |
| O | -2.9775 1  | -2.0114 1 | -4.1457 1 |
| C | -1.5715 1  | -2.0963 1 | -3.9656 1 |
| O | -1.2700 1  | -2.8602 1 | -2.8108 1 |
| C | -2.0012 1  | -2.6677 1 | -1.6664 1 |
| O | -1.5004 1  | -3.1550 1 | -0.6730 1 |
| O | -4.9120 1  | -1.4106 1 | -3.4071 1 |
| C | -0.9910 1  | -0.7008 1 | -3.8229 1 |
| C | -1.0674 1  | -2.9134 1 | -5.1414 1 |
| O | -5.8764 1  | -0.4137 1 | -1.1576 1 |
| H | -11.9638 1 | -0.5287 1 | 3.8908 1  |
| H | -11.4030 1 | 1.1326 1  | 4.0705 1  |
| H | -10.2853 1 | -0.3021 1 | 5.7754 1  |
| H | -9.7397 1  | -1.4359 1 | 4.5375 1  |
| H | -7.8662 1  | 0.1076 1  | 5.1836 1  |
| H | -8.8707 1  | 1.5389 1  | 4.8216 1  |
| H | -8.9441 1  | 0.9244 1  | 1.1271 1  |
| H | -9.5102 1  | 2.0188 1  | 2.4195 1  |
| H | -10.4019 1 | -0.9333 1 | 1.9927 1  |
| H | -11.3685 1 | 0.5064 1  | 1.6550 1  |
| H | -6.4755 1  | -0.4967 1 | 3.5442 1  |
| H | -7.3188 1  | 0.1490 1  | 0.5864 1  |
| H | -4.8594 1  | -1.2302 1 | 1.8943 1  |
| H | -3.3089 1  | -2.0206 1 | 0.3513 1  |
| H | -1.3817 1  | -0.1759 1 | -2.9409 1 |
| H | 0.1025 1   | -0.7345 1 | -3.7219 1 |
| H | -1.2257 1  | -0.0819 1 | -4.7004 1 |
| H | 0.0194 1   | -3.0623 1 | -5.0834 1 |
| H | -1.5354 1  | -3.9088 1 | -5.1689 1 |
| H | -1.2957 1  | -2.4176 1 | -6.0951 1 |
| H | -5.6516 1  | -0.7339 1 | -2.0827 1 |

## 5.1 DASA 1 modelling

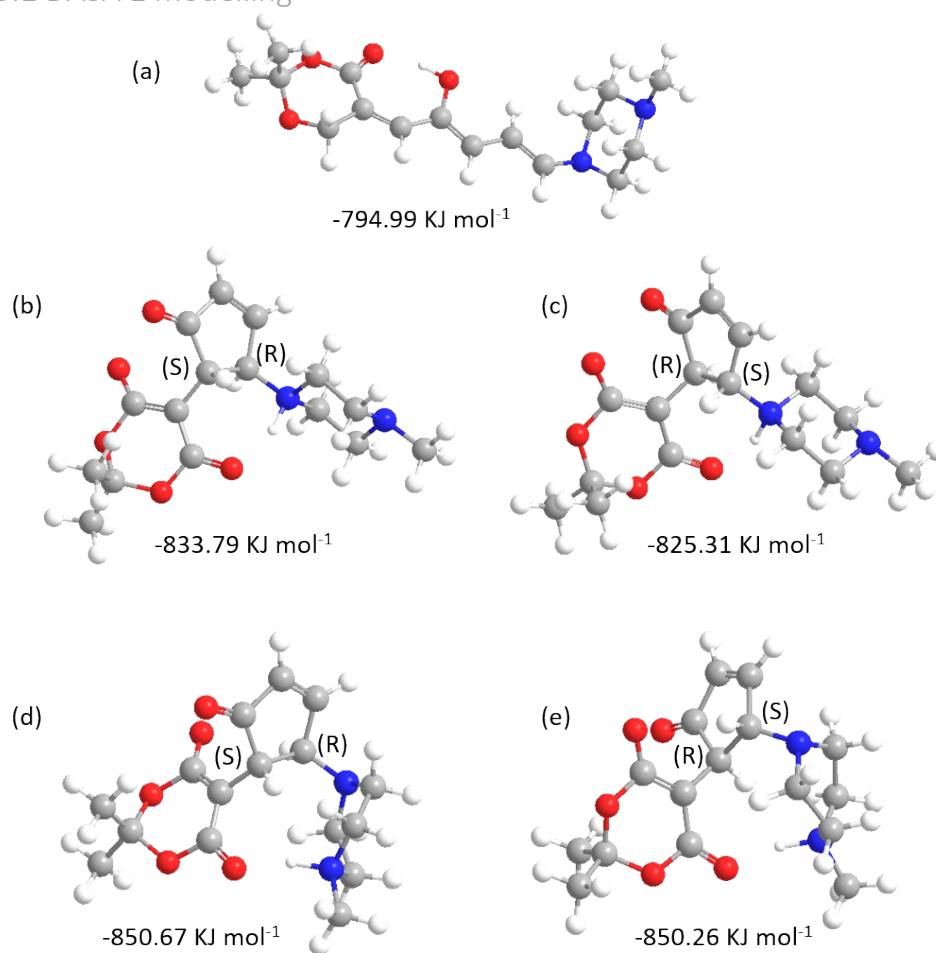

Figure S14. (a) Chem3D model of triene form of DASA 1, and the value for the simulated heat of formation. (b-e) Chem3D models of possible cyclopentanone forms of DASA 1, and the values for the simulated heats of formation.

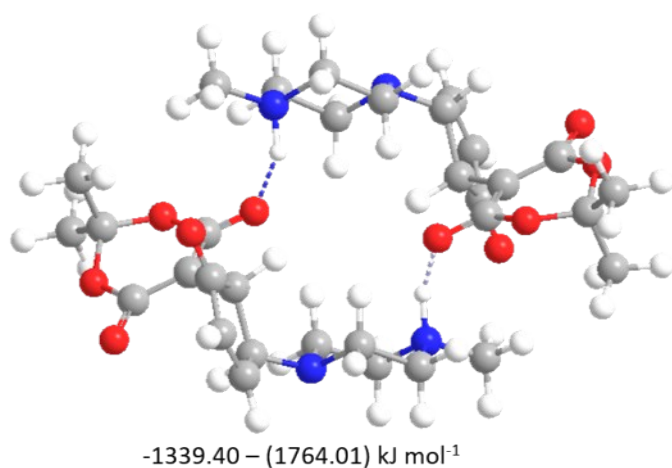

The calculated heats of formation for the modeled dimer fall in the range shown. Some calculations showed that the dimer is a lower energy conformation than two free molecules, but at not always. These are preliminary results and further higher-level calculations are ongoing.

Figure S15. (a) Chem3D model of cyclopentanone form of DASA 1 in the dimer conformation found in the crystal structure, also shown is the range of the heat of formation found for this dimer.

**DASA 1:** Cartesian co-ordinates for lowest energy minimised energy conformation in chloroform.

|    |   |               |              |              |
|----|---|---------------|--------------|--------------|
| 1  | C | -14.561590550 | 5.252963156  | 1.501590571  |
| 2  | C | -16.315824672 | 3.573563184  | 0.638726655  |
| 3  | O | -13.212572497 | 1.039428131  | 0.638780487  |
| 4  | O | -14.365816880 | 4.000596272  | -2.821104552 |
| 5  | C | -14.319691819 | 3.554222536  | -1.663413309 |
| 6  | O | -14.563729218 | 4.512315994  | -0.717057411 |
| 7  | C | -14.880229431 | 4.067790627  | 0.606215005  |
| 8  | O | -14.002080513 | 3.037008465  | 1.007846754  |
| 9  | C | -13.727519579 | 2.009459158  | 0.118577124  |
| 10 | C | -12.233996888 | 0.732075723  | -4.841855445 |
| 11 | C | -13.207873640 | 1.792595456  | -5.415988077 |
| 12 | N | -12.918111798 | 3.174020821  | -4.886864867 |
| 13 | C | -11.467700726 | 3.280914901  | -4.496160570 |
| 14 | C | -11.204722048 | 2.349438367  | -3.300116417 |
| 15 | C | -14.011328701 | 2.254761250  | -1.247657462 |
| 16 | N | -11.701875402 | 0.967791352  | -3.497470273 |
| 17 | O | -15.972987687 | 0.015447915  | -1.422625944 |
| 18 | C | -14.842793046 | -0.042646993 | -1.828780456 |
| 19 | C | -13.967595009 | 1.153908128  | -2.222026573 |
| 20 | C | -12.542030673 | 0.515918090  | -2.381179985 |
| 21 | C | -12.809412604 | -0.977731031 | -2.442771809 |
| 22 | C | -14.066273717 | -1.279752033 | -2.089066116 |
| 23 | C | -13.261462135 | 4.207889372  | -5.913152978 |
| 24 | H | -14.743889538 | 5.009271958  | 2.557386837  |
| 25 | H | -13.507740238 | 5.551529086  | 1.409430335  |
| 26 | H | -15.175067427 | 6.124480008  | 1.238781167  |
| 27 | H | -17.013668894 | 4.352387126  | 0.305261777  |
| 28 | H | -16.462223646 | 2.702277604  | -0.017737307 |
| 29 | H | -16.606496118 | 3.266548076  | 1.652525992  |
| 30 | H | -11.350031661 | 0.645288242  | -5.521444787 |
| 31 | H | -12.733156167 | -0.265790035 | -4.877356236 |
| 32 | H | -14.267435664 | 1.539427231  | -5.178442861 |
| 33 | H | -13.139964541 | 1.774624760  | -6.527551069 |
| 34 | H | -13.534261054 | 3.362670383  | -3.983201198 |
| 35 | H | -11.232150473 | 4.335467330  | -4.219062449 |
| 36 | H | -10.813787822 | 3.031508609  | -5.359521696 |
| 37 | H | -10.101844435 | 2.272140379  | -3.134471388 |
| 38 | H | -11.624777418 | 2.803031372  | -2.368601680 |
| 39 | H | -14.346839630 | 1.501126381  | -3.213931583 |
| 40 | H | -11.955353843 | 0.715128751  | -1.432404629 |
| 41 | H | -12.012131251 | -1.651489270 | -2.715215081 |
| 42 | H | -14.519294718 | -2.250115820 | -1.989518303 |
| 43 | H | -14.321665661 | 4.114080259  | -6.217800546 |
| 44 | H | -12.634278717 | 4.126659905  | -6.816113770 |
| 45 | H | -13.130556451 | 5.224503386  | -5.493799559 |

## 5.2 DASA 2 modelling

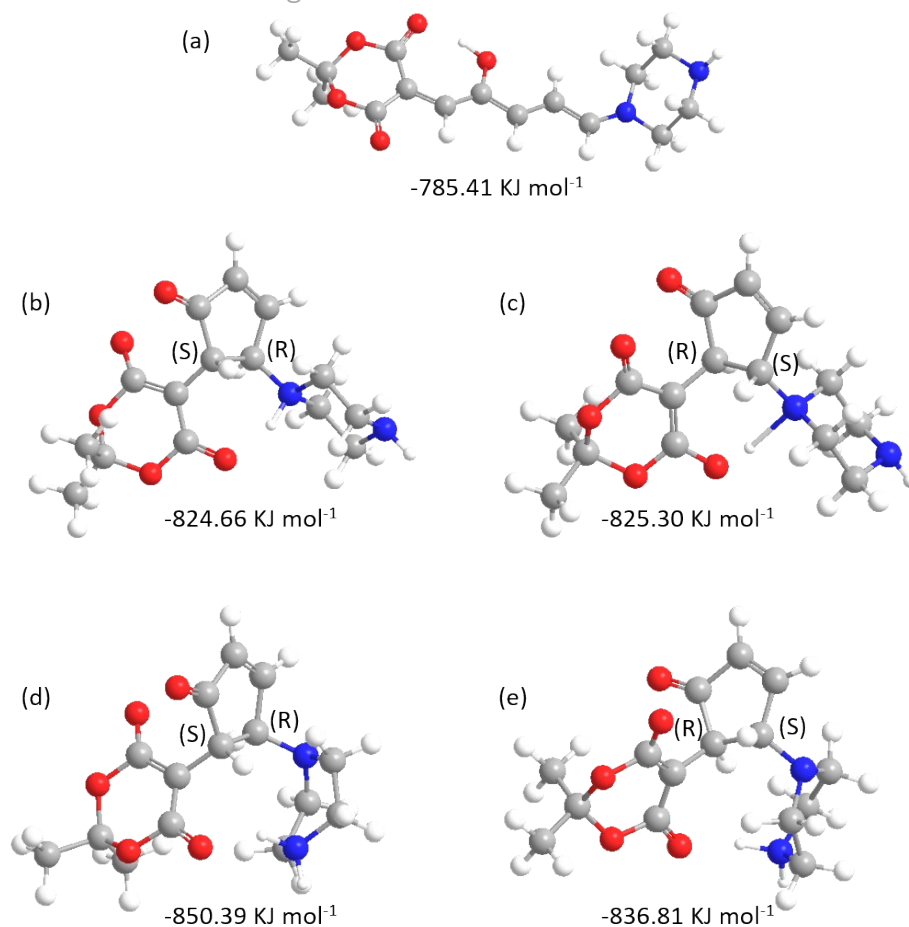

Figure S16. (a) Chem3D model of triene form of DASA 2, and the value for the simulated heat of formation. (b-e) Chem3D models of possible cyclopentanone forms of DASA 2, and the values for the simulated heats of formation.

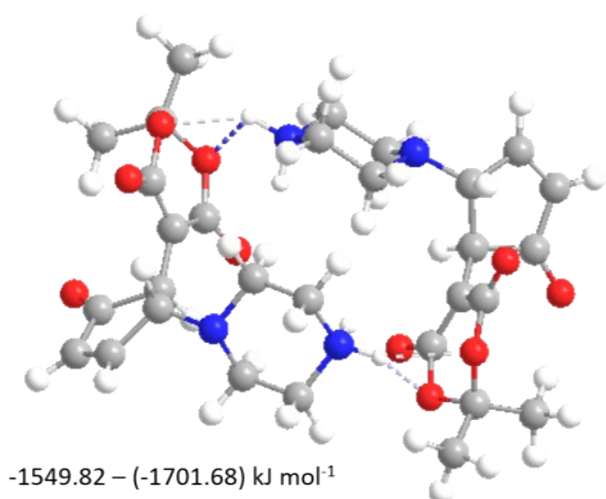

The calculated heats of formation for the modeled dimer fall in the range shown. Some calculations showed that the dimer is a lower energy conformation than two free molecules, but at not always. These are preliminary results and further higher-level calculations are ongoing.

Figure S17. Chem3D model of cyclopentanone form of DASA 2 in the dimer conformation found in the crystal structure, the range of the simulated heats of formation of the dimer is also shown.

**DASA 2:** Cartesian co-ordinates for lowest energy minimised energy conformation in chloroform.

|    |   |               |              |              |
|----|---|---------------|--------------|--------------|
| 1  | C | -6.885314871  | 2.458325194  | -0.726199344 |
| 2  | C | -8.176918122  | 2.201183856  | -0.478805247 |
| 3  | C | -8.406726816  | 0.751966743  | -0.093761158 |
| 4  | C | -6.964744235  | 0.197225875  | 0.182499363  |
| 5  | C | -6.059335139  | 1.255784239  | -0.459533023 |
| 6  | O | -4.881095176  | 1.139421307  | -0.671118006 |
| 7  | N | -9.416297354  | 0.616896891  | 0.963596081  |
| 8  | C | -6.733138079  | -1.156169444 | -0.342441588 |
| 9  | C | -9.850370322  | -0.788240918 | 1.145523911  |
| 10 | C | -9.744333142  | -1.289982626 | 2.595648228  |
| 11 | N | -8.387044127  | -0.941594586 | 3.148102153  |
| 12 | C | -8.228602378  | 0.554973134  | 3.244060861  |
| 13 | C | -9.124962865  | 1.302281598  | 2.225261074  |
| 14 | C | -6.842265215  | -1.415650095 | -1.729867528 |
| 15 | O | -6.343844575  | -2.630950245 | -2.176838821 |
| 16 | C | -5.421196263  | -3.316273143 | -1.354674119 |
| 17 | O | -5.902481088  | -3.365130563 | -0.006422014 |
| 18 | C | -6.389681318  | -2.200616142 | 0.525579604  |
| 19 | O | -6.505625985  | -2.243286938 | 1.759185636  |
| 20 | O | -7.369079691  | -0.752842735 | -2.602245471 |
| 21 | C | -4.071467113  | -2.620709987 | -1.386129653 |
| 22 | C | -5.433017219  | -4.758971997 | -1.829993036 |
| 23 | H | -6.437778743  | 3.375607652  | -1.068626774 |
| 24 | H | -9.017826466  | 2.873441353  | -0.555800848 |
| 25 | H | -8.821782089  | 0.221705765  | -1.005806681 |
| 26 | H | -6.744801100  | 0.228512792  | 1.279105050  |
| 27 | H | -10.918278952 | -0.837732811 | 0.818782101  |
| 28 | H | -9.288486829  | -1.475730332 | 0.465476624  |
| 29 | H | -9.882347630  | -2.396484281 | 2.634811400  |
| 30 | H | -10.540155103 | -0.853146360 | 3.237561534  |
| 31 | H | -7.620933177  | -1.359305399 | 2.498845877  |
| 32 | H | -8.254862738  | -1.374850487 | 4.083896417  |
| 33 | H | -7.151998536  | 0.808332217  | 3.098300326  |
| 34 | H | -8.478909524  | 0.893905675  | 4.274357030  |
| 35 | H | -10.112035392 | 1.524515245  | 2.702231017  |
| 36 | H | -8.669906567  | 2.299286951  | 2.012284792  |
| 37 | H | -3.350969832  | -3.115901883 | -0.723384033 |
| 38 | H | -3.654025190  | -2.617347475 | -2.402825352 |
| 39 | H | -4.143057558  | -1.570811480 | -1.062830408 |
| 40 | H | -4.748198984  | -5.377580037 | -1.233012885 |
| 41 | H | -6.435364827  | -5.201429556 | -1.745691517 |
| 42 | H | -5.128746182  | -4.826449865 | -2.883066707 |

### 5.3 DASA 3 modelling

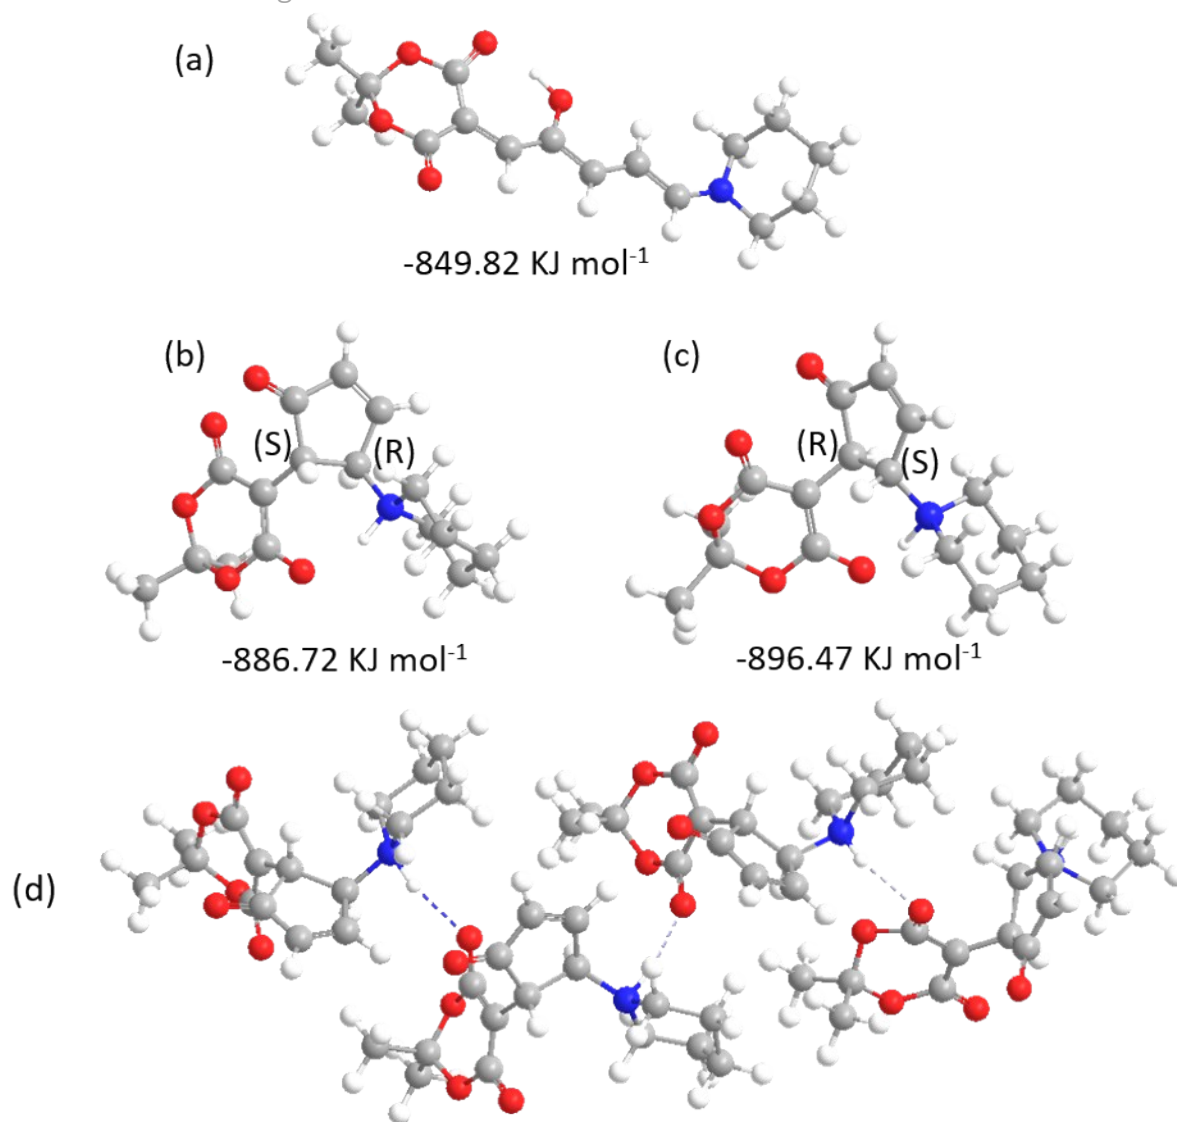

Figure S18. (a) Chem3D model of triene form of DASA 3, and the value for the simulated heat of formation. (b,c) Chem3D models of possible cyclized forms of DASA 3, and the values for the simulated heats of formation. (d) Chem3D model of cyclized form of DASA 3 in the chain-like conformation found in the crystal structure.

**DASA 3:** Cartesian co-ordinates for lowest energy minimised energy conformation in chloroform.

|    |   |              |              |              |
|----|---|--------------|--------------|--------------|
| 1  | C | 5.362370107  | 1.866160188  | -1.051934154 |
| 2  | C | 4.459366671  | 0.975548837  | -0.621073248 |
| 3  | C | 5.094664704  | -0.061791201 | 0.268877042  |
| 4  | C | 6.507701057  | 0.525439436  | 0.628419029  |
| 5  | C | 6.694150072  | 1.628710505  | -0.415190231 |
| 6  | O | 7.693865106  | 2.256792772  | -0.618681245 |
| 7  | N | 4.362688600  | -0.422434349 | 1.539425821  |
| 8  | C | 7.509404521  | -0.545359845 | 0.666362446  |
| 9  | C | 3.777573443  | 0.790935619  | 2.226818781  |
| 10 | C | 3.176554755  | 0.369306503  | 3.569115926  |
| 11 | C | 2.089740281  | -0.689341242 | 3.363527220  |
| 12 | C | 2.650413968  | -1.883869239 | 2.587166626  |
| 13 | C | 3.268033995  | -1.430200292 | 1.263012950  |
| 14 | C | 7.522259593  | -1.390001425 | 1.791527489  |
| 15 | O | 8.549149451  | -2.277456479 | 1.939947167  |
| 16 | C | 9.708496985  | -2.099525948 | 1.116304159  |
| 17 | O | 9.345309969  | -1.776815682 | -0.208394500 |
| 18 | C | 8.361115251  | -0.821188567 | -0.425138663 |
| 19 | O | 8.326768452  | -0.404268947 | -1.565257941 |
| 20 | O | 6.652909054  | -1.470464062 | 2.667596826  |
| 21 | C | 10.348698182 | -3.475815629 | 1.045554744  |
| 22 | C | 10.568781147 | -0.995418316 | 1.706967579  |
| 23 | H | 5.223372143  | 2.677960142  | -1.746989199 |
| 24 | H | 3.414774013  | 0.913861102  | -0.882992074 |
| 25 | H | 5.240792122  | -1.011959274 | -0.326497290 |
| 26 | H | 6.475845003  | 1.043939858  | 1.628187162  |
| 27 | H | 5.106597928  | -0.879015402 | 2.196054899  |
| 28 | H | 3.005151911  | 1.258179183  | 1.576338756  |
| 29 | H | 4.578322819  | 1.552273468  | 2.374920868  |
| 30 | H | 3.964004845  | -0.012116625 | 4.252428336  |
| 31 | H | 2.757787521  | 1.258846336  | 4.083425780  |
| 32 | H | 1.692193415  | -1.023318081 | 4.342481251  |
| 33 | H | 1.222332409  | -0.254450504 | 2.830194405  |
| 34 | H | 3.396711384  | -2.428162904 | 3.203408880  |
| 35 | H | 1.849447332  | -2.625363012 | 2.387112432  |
| 36 | H | 3.703916368  | -2.299941605 | 0.715881515  |
| 37 | H | 2.500691812  | -0.979321282 | 0.596392645  |
| 38 | H | 11.256581516 | -3.456552164 | 0.426910079  |
| 39 | H | 10.620835202 | -3.837473150 | 2.046205007  |
| 40 | H | 9.663724827  | -4.213171944 | 0.603462934  |
| 41 | H | 11.481443513 | -0.846779462 | 1.113610126  |
| 42 | H | 10.036827032 | -0.033672241 | 1.731993602  |
| 43 | H | 10.866840856 | -1.230736379 | 2.736760656  |

#### 5.4 DASA 4 modelling

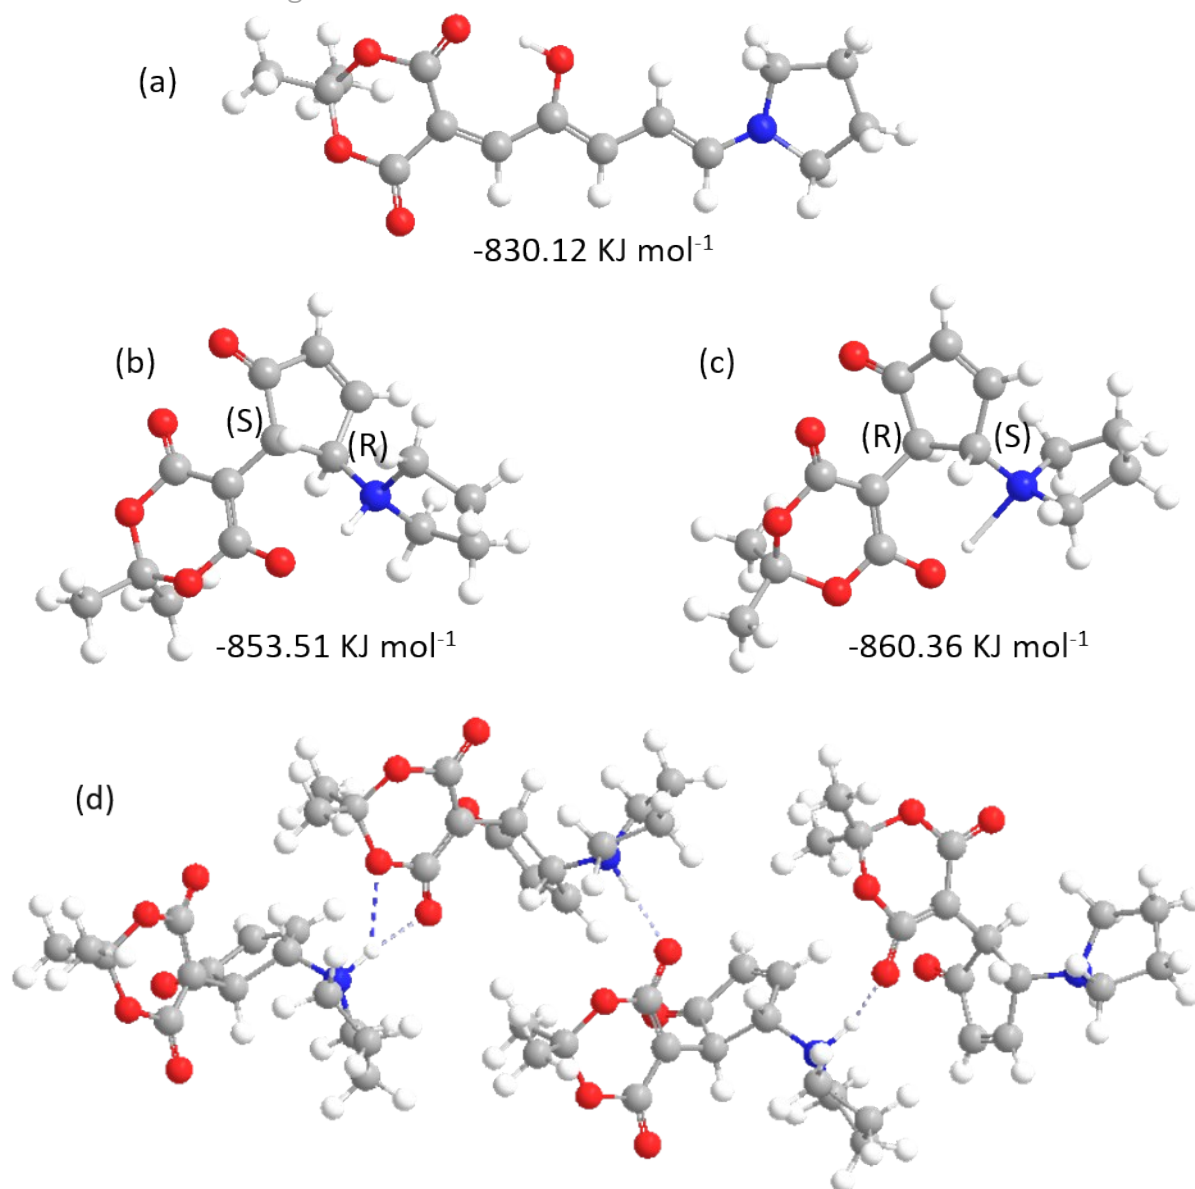

Figure S19. (a) Chem3D model of triene form of DASA 4, and the value for the simulated heat of formation. (b,c) Chem3D models of possible cyclopentanone forms of DASA 4, and the values for the simulated heats of formation. (d) Chem3D model of cyclized form of DASA 4 in the chain-like conformation found in the crystal structure.



**DASA 4:** Cartesian co-ordinates for lowest energy minimised energy conformation in chloroform.

|    |   |               |              |              |
|----|---|---------------|--------------|--------------|
| 1  | C | -10.281976697 | 2.430672618  | -0.739969538 |
| 2  | C | -11.240939380 | 1.572071006  | -0.369898609 |
| 3  | C | -10.662318550 | 0.373941161  | 0.338822223  |
| 4  | C | -9.181291833  | 0.780220154  | 0.673584371  |
| 5  | C | -8.948167019  | 1.997020025  | -0.224119679 |
| 6  | O | -7.906977837  | 2.562777122  | -0.401465583 |
| 7  | N | -11.348348063 | -0.082210306 | 1.603877179  |
| 8  | C | -8.284912233  | -0.368728901 | 0.501492639  |
| 9  | C | -8.314164304  | -1.374762011 | 1.484015700  |
| 10 | O | -7.367159287  | -2.356501229 | 1.455783375  |
| 11 | C | -6.221650330  | -2.152839088 | 0.616899494  |
| 12 | O | -6.596392934  | -1.604181953 | -0.627058195 |
| 13 | C | -7.494793183  | -0.544814117 | -0.655416919 |
| 14 | O | -7.523504742  | 0.043275806  | -1.717152732 |
| 15 | O | -9.161673877  | -1.515172628 | 2.376706821  |
| 16 | C | -5.709203886  | -3.550898299 | 0.314121915  |
| 17 | C | -5.248771188  | -1.227915072 | 1.328035418  |
| 18 | C | -12.618992189 | -0.854802372 | 1.313328161  |
| 19 | C | -13.786675102 | 0.122409414  | 1.477642593  |
| 20 | C | -13.246631061 | 1.324003068  | 2.269719354  |
| 21 | C | -11.753562814 | 1.066878966  | 2.504635604  |
| 22 | H | -10.380353596 | 3.337258990  | -1.314117969 |
| 23 | H | -12.300291234 | 1.636265106  | -0.562596847 |
| 24 | H | -10.646544333 | -0.500773456 | -0.376467451 |
| 25 | H | -9.107038206  | 1.156452136  | 1.733004985  |
| 26 | H | -10.619162815 | -0.722939308 | 2.110116142  |
| 27 | H | -6.473492732  | -4.155495980 | -0.194587171 |
| 28 | H | -4.828746222  | -3.512963937 | -0.342461243 |
| 29 | H | -5.429794559  | -4.079087608 | 1.235343219  |
| 30 | H | -4.341272523  | -1.073597810 | 0.728020653  |
| 31 | H | -5.688506653  | -0.237563101 | 1.513278105  |
| 32 | H | -4.948009004  | -1.638661910 | 2.300521066  |
| 33 | H | -12.691287275 | -1.698230947 | 2.037084365  |
| 34 | H | -12.583738375 | -1.309587099 | 0.300433632  |
| 35 | H | -14.191467472 | 0.439350162  | 0.498405730  |
| 36 | H | -14.635994636 | -0.356567402 | 1.999508713  |
| 37 | H | -13.782772974 | 1.448351177  | 3.228928044  |
| 38 | H | -13.413257938 | 2.269620753  | 1.720805302  |
| 39 | H | -11.136542112 | 1.967660497  | 2.300229174  |
| 40 | H | -11.553129572 | 0.776101181  | 3.560555888  |

## 5.5 Charge on Nitrogen atoms in donor moieties

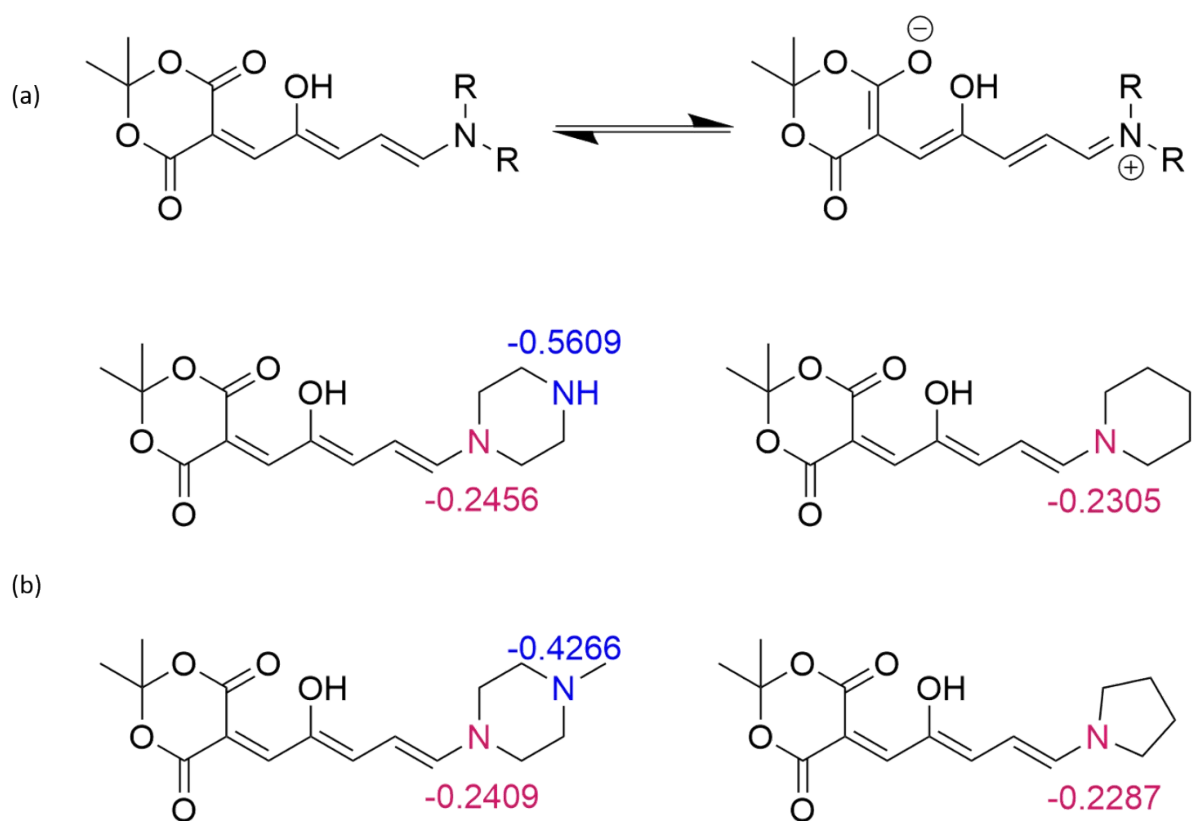

Figure S20. (a) Structural representation of the polarization of the triene moiety. (b) Skeletal structures of DASAs 1 – 4 with the charge on the nitrogen atoms shown.

## 5.6 Density functional theory calculations

All density functional theory (DFT) calculations were run using the GAMESS-US code 5 Dec 2014 (R1).<sup>6</sup> All minimum energy confirmations and frequencies were determined at the B3-LYP/6-31+G(d) level of theory<sup>7,8</sup> at 298.15 K starting with minimum energy confirmations determined by the PM7 calculations. Single-point energy calculations were conducted at the B3LYP/6-311++G(d,p), BMK/aug-cc-pVTZ,<sup>9</sup> and M06-2X/aug-cc-pVTZ<sup>10</sup> levels of theory using unrestricted wave functions. DFT-D3 dispersion corrections were utilised in all cases.<sup>11,12</sup> Cartesian coordinates and energies are given below.

### TRIENE FORM

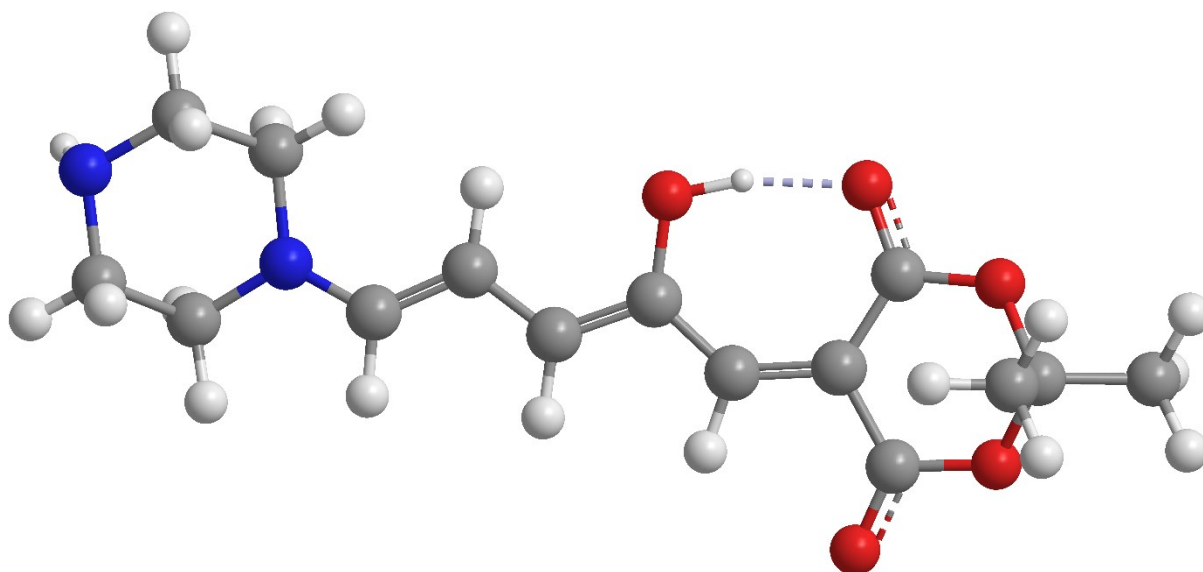

| ATOM | CHARGE | X             | Y             | Z             |
|------|--------|---------------|---------------|---------------|
| C    | 6.0    | 0.3407979170  | 2.5463022177  | 5.3931700752  |
| C    | 6.0    | -0.5792309646 | 1.9376939307  | 4.3194114926  |
| N    | 7.0    | -0.3284686796 | 0.4942162276  | 4.1936922638  |
| C    | 6.0    | -0.3879564405 | -0.2434572202 | 5.4673213028  |
| C    | 6.0    | 0.5314813976  | 0.4078928636  | 6.5131965006  |
| C    | 6.0    | -0.2204005868 | -0.1504274046 | 3.0282080688  |
| C    | 6.0    | -0.2876669063 | 0.3800067537  | 1.7401748930  |
| C    | 6.0    | -0.1672712243 | -0.4608041538 | 0.6281805858  |
| C    | 6.0    | -0.2544887222 | -0.0272438555 | -0.7064808227 |
| O    | 8.0    | -0.4140835599 | 1.3114537893  | -0.9069020905 |
| C    | 6.0    | -0.1899412863 | -0.9943023678 | -1.7177931390 |
| C    | 6.0    | -0.2609887648 | -0.9529979404 | -3.1276343150 |
| C    | 6.0    | -0.2137390000 | -2.2507279906 | -3.8021425658 |
| O    | 8.0    | -0.2348894910 | -2.2432200703 | -5.1736187487 |
| C    | 6.0    | 0.1738373412  | -1.0587926100 | -5.8714585825 |
| O    | 8.0    | -0.4482435712 | 0.1024758812  | -5.2798988325 |
| C    | 6.0    | -0.4761055184 | 0.2329100436  | -3.9266260727 |
| O    | 8.0    | -0.2176970036 | -3.3431627557 | -3.2485508765 |
| O    | 8.0    | -0.7364621258 | 1.3691047610  | -3.5034518620 |
| C    | 6.0    | 1.6938080347  | -0.9139460383 | -5.8336696289 |

|   |     |               |               |               |
|---|-----|---------------|---------------|---------------|
| C | 6.0 | -0.3858239603 | -1.1686558905 | -7.2780740691 |
| N | 7.0 | 0.2952494500  | 1.8451086839  | 6.6786595897  |
| H | 1.0 | 0.0624389982  | 3.5951892013  | 5.5444372060  |
| H | 1.0 | 1.3765784566  | 2.5269809344  | 5.0303295179  |
| H | 1.0 | -1.6353677123 | 2.0860005587  | 4.5896679732  |
| H | 1.0 | -0.4056543752 | 2.4272874119  | 3.3597916761  |
| H | 1.0 | -0.0927904778 | -1.2820460043 | 5.2867180352  |
| H | 1.0 | -1.4283134873 | -0.2410106970 | 5.8245941803  |
| H | 1.0 | 1.5783966790  | 0.2649375905  | 6.2163957405  |
| H | 1.0 | 0.3881357216  | -0.0932824790 | 7.4772204091  |
| H | 1.0 | -0.0609822293 | -1.2235650022 | 3.1284697850  |
| H | 1.0 | -0.4554748890 | 1.4364027536  | 1.5681288488  |
| H | 1.0 | -0.0026250659 | -1.5239048502 | 0.7875997536  |
| H | 1.0 | -0.5684869498 | 1.4774785614  | -1.8757989505 |
| H | 1.0 | -0.0674779125 | -2.0061265633 | -1.3403352886 |
| H | 1.0 | 2.0680444665  | -0.8241698304 | -4.8084023403 |
| H | 1.0 | 2.1582426585  | -1.7936040308 | -6.2916736403 |
| H | 1.0 | 1.9987194020  | -0.0239919912 | -6.3936104376 |
| H | 1.0 | -1.4766280709 | -1.2549940845 | -7.2430621039 |
| H | 1.0 | -0.1166479425 | -0.2813239078 | -7.8595112874 |
| H | 1.0 | 0.0250393304  | -2.0529401167 | -7.7752739054 |
| H | 1.0 | -0.6003629351 | 2.0061856906  | 7.1380116617  |

CYCLOPENTANONE form: N1 protonated (cyclopentanone N1)

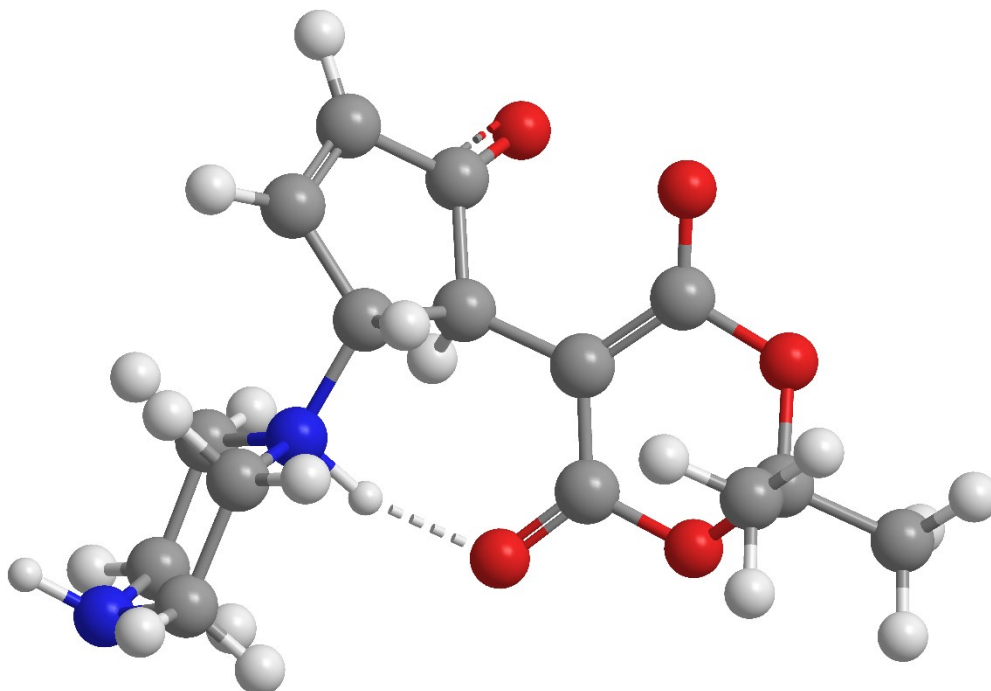

| ATOM | CHARGE | X            | Y             | Z            |
|------|--------|--------------|---------------|--------------|
| C    | 6.0    | 1.4527413843 | 0.1899972858  | 0.0199538057 |
| C    | 6.0    | 1.4473011662 | -1.0299650223 | 0.7226450172 |

|   |     |               |               |               |
|---|-----|---------------|---------------|---------------|
| O | 8.0 | 2.5968635554  | -1.4477930731 | 1.3414758650  |
| C | 6.0 | 3.5805743637  | -0.4460025824 | 1.6899373421  |
| O | 8.0 | 3.7283070592  | 0.5294330324  | 0.6544014942  |
| C | 6.0 | 2.5825066982  | 1.0532165995  | 0.0523065033  |
| O | 8.0 | 0.4539342411  | -1.7994921268 | 0.8270190437  |
| O | 8.0 | 2.6754673811  | 2.1852641606  | -0.4211512236 |
| C | 6.0 | 0.1754197040  | 0.5317465362  | -0.7048912883 |
| C | 6.0 | 0.1826698261  | 1.5258965680  | -1.8803012472 |
| C | 6.0 | -1.0346753633 | 2.3687730054  | -1.7521023267 |
| C | 6.0 | -1.7307989362 | 2.0449932574  | -0.6497760110 |
| C | 6.0 | -0.9892950303 | 1.0312355503  | 0.1871598329  |
| O | 8.0 | 0.9618427102  | 1.5297872483  | -2.8168586819 |
| N | 7.0 | -1.7999629583 | -0.1570871486 | 0.7112361155  |
| C | 6.0 | -2.5340029516 | 0.1379270038  | 1.9964201803  |
| C | 6.0 | -2.7480353406 | -0.7831092958 | -0.2863009291 |
| C | 6.0 | -3.3476799012 | -2.0607859370 | 0.3208114418  |
| C | 6.0 | 4.9099263408  | -1.1738846516 | 1.7983072001  |
| C | 6.0 | 3.1592638349  | 0.2338590718  | 2.9936259218  |
| C | 6.0 | -3.1635985700 | -1.1474321035 | 2.5510531282  |
| H | 1.0 | -4.9025837603 | -1.3367887464 | 1.4614864121  |
| H | 1.0 | -0.1616145770 | -0.3995899887 | -1.1865260786 |
| H | 1.0 | -1.3035741986 | 3.1190137115  | -2.4895468474 |
| H | 1.0 | -2.6669788122 | 2.5047393967  | -0.3431447629 |
| H | 1.0 | -0.5918595442 | 1.5082454946  | 1.0894435663  |
| H | 1.0 | -3.2974338201 | 0.8922074927  | 1.7767675819  |
| H | 1.0 | -1.8165897307 | 0.5641365704  | 2.7033714612  |
| H | 1.0 | -2.1927692789 | -1.0068495497 | -1.1999557880 |
| H | 1.0 | -3.5258481942 | -0.0481520213 | -0.5155468394 |
| H | 1.0 | -4.0471358003 | -2.4964105569 | -0.3995833788 |
| H | 1.0 | -2.5465105627 | -2.7963003138 | 0.4735457808  |
| H | 1.0 | 5.1594303869  | -1.6416880333 | 0.8403265018  |
| H | 1.0 | 5.7034923163  | -0.4673559201 | 2.0629897681  |
| H | 1.0 | 4.8584804607  | -1.9498609135 | 2.5692291924  |
| H | 1.0 | 3.0788911612  | -0.5061631094 | 3.7971295133  |
| H | 1.0 | 3.9038365030  | 0.9848332631  | 3.2790106997  |
| H | 1.0 | 2.1911263936  | 0.7347858294  | 2.8847704126  |
| H | 1.0 | -3.7350236408 | -0.8949616409 | 3.4497515627  |
| H | 1.0 | -2.3644453608 | -1.8352905985 | 2.8600070434  |
| N | 7.0 | -4.0279010204 | -1.8453675815 | 1.5981254369  |
| H | 1.0 | -1.0478281339 | -0.8751501630 | 0.9000375780  |

Cyclopentanone form: N2 protonated (cyclopentanone N2)

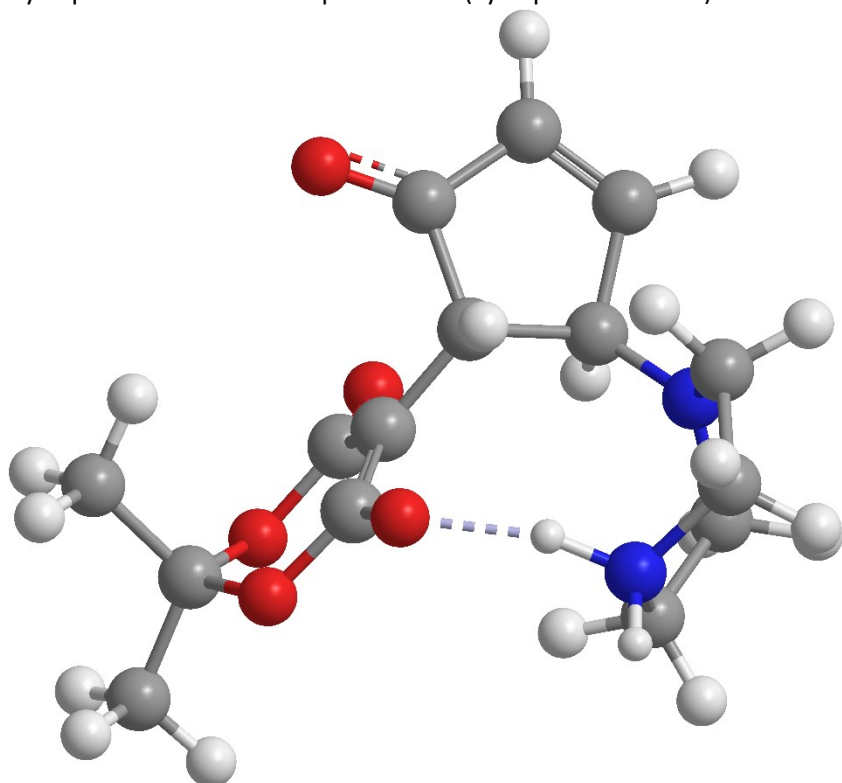

| ATOM | CHARGE | X             | Y             | Z             |
|------|--------|---------------|---------------|---------------|
| C    | 6.0    | -0.1103320000 | 0.3255567933  | 1.0238343108  |
| C    | 6.0    | -1.1425928782 | -0.1228312231 | 1.8973770511  |
| O    | 8.0    | -0.7896672104 | -1.0612786158 | 2.8574014383  |
| C    | 6.0    | 0.5910884110  | -1.1322290198 | 3.2413704984  |
| O    | 8.0    | 1.4357468952  | -1.1645521556 | 2.0715850678  |
| C    | 6.0    | 1.1558883141  | -0.2780508304 | 1.0578273404  |
| O    | 8.0    | -2.3350042484 | 0.1912590657  | 1.8371985921  |
| O    | 8.0    | 2.0784697736  | -0.1362452723 | 0.2063142288  |
| C    | 6.0    | -0.4191208340 | 1.3701673220  | -0.0073867602 |
| C    | 6.0    | -0.9530194935 | 2.7115845825  | 0.5345915291  |
| C    | 6.0    | -1.8925458086 | 3.2537592481  | -0.4666054844 |
| C    | 6.0    | -2.1302476342 | 2.3323885620  | -1.4165240487 |
| C    | 6.0    | -1.4382814440 | 1.0110805086  | -1.1484900483 |
| O    | 8.0    | -0.6272415738 | 3.2419353394  | 1.5895838695  |
| N    | 7.0    | -0.9495446861 | 0.3588216196  | -2.3618896502 |
| C    | 6.0    | 0.1591034749  | 0.9569356812  | -3.1085675127 |
| C    | 6.0    | -1.0509419170 | -1.0838628872 | -2.4989546663 |
| C    | 6.0    | 0.1930998644  | -1.8423154877 | -1.9925783486 |
| C    | 6.0    | 0.7756472990  | -2.4712205368 | 3.9363017548  |
| C    | 6.0    | 0.9625730638  | 0.0558309213  | 4.1300972823  |
| C    | 6.0    | 1.2669334629  | -0.0690627784 | -3.4202190493 |
| N    | 7.0    | 1.4387738575  | -1.0135917466 | -2.2643300545 |
| H    | 1.0    | 0.5297325472  | 1.6402389739  | -0.4895381815 |
| H    | 1.0    | -2.3213473374 | 4.2491503658  | -0.3947755328 |
| H    | 1.0    | -2.7795743742 | 2.4628010392  | -2.2797104465 |

|   |     |               |               |               |
|---|-----|---------------|---------------|---------------|
| H | 1.0 | -2.1851222912 | 0.3332548178  | -0.7166116986 |
| H | 1.0 | 0.5837469779  | 1.7904747889  | -2.5381964602 |
| H | 1.0 | -0.1760113716 | 1.3785810222  | -4.0695031236 |
| H | 1.0 | -1.9291682156 | -1.4484345661 | -1.9577226940 |
| H | 1.0 | -1.2194491156 | -1.3324772029 | -3.5565946279 |
| H | 1.0 | 0.3064081506  | -2.8061291048 | -2.4971019340 |
| H | 1.0 | 0.1653647061  | -2.0125122364 | -0.9150495052 |
| H | 1.0 | 0.5082298592  | -3.2871247753 | 3.2567428825  |
| H | 1.0 | 1.8181023935  | -2.5964801855 | 4.2472102673  |
| H | 1.0 | 0.1353511991  | -2.5251542715 | 4.8226179500  |
| H | 1.0 | 0.8360659531  | 1.0059338936  | 3.6026260475  |
| H | 1.0 | 0.3224207845  | 0.0640329411  | 5.0187588574  |
| H | 1.0 | 2.0064563776  | -0.0302927332 | 4.4508781738  |
| H | 1.0 | 2.2260232399  | 0.4200730974  | -3.6066012083 |
| H | 1.0 | 1.0197525603  | -0.6732078258 | -4.2969542935 |
| H | 1.0 | 2.2395355836  | -1.6301616318 | -2.4370672239 |
| H | 1.0 | 1.6898819266  | -0.5014412529 | -1.367887439  |

---

**B3LYP/6-311++G(d,p)-D3 CHCl3**

|                          | $E_{\text{tot}}$ (Hartrees) | $E_{\text{tot}}$ (kJ mol <sup>-1</sup> ) | $\Delta E$ | $\Delta H$ | $\Delta G$ | $\Delta S$ |
|--------------------------|-----------------------------|------------------------------------------|------------|------------|------------|------------|
| <b>Triene</b>            | -1069.014786                | -2806697.916                             | 964.127    | 966.606    | 777.931    | 632.819    |
| <b>Cyclopentanone N1</b> | -1069.013997                | -2806695.843                             | 965.19     | 967.669    | 787.424    | 604.544    |
| <b>Cyclopentanone N2</b> | -1069.022238                | -2806717.479                             | 965.063    | 967.542    | 785.939    | 609.1      |
| $\Delta G$ C-N1 to C-N2  |                             | -23.120                                  |            |            |            |            |

---

**M06-2X/aug-cc-pVTZ-D3 CHCl3**

|                          | $E_{\text{tot}}$ (Hartrees) | $E_{\text{tot}}$ (kJ mol <sup>-1</sup> ) | $\Delta E$ | $\Delta H$ | $\Delta G$ | $\Delta S$ |
|--------------------------|-----------------------------|------------------------------------------|------------|------------|------------|------------|
| <b>Triene</b>            | -1069.29                    | -2807412                                 | 964.127    | 966.606    | 777.931    | 632.819    |
| <b>Cyclopentanone N1</b> | -1069.3                     | -2807443                                 | 965.19     | 967.669    | 787.424    | 604.544    |
| <b>Cyclopentanone N2</b> | -1069.32                    | -2807489                                 | 965.063    | 967.542    | 785.939    | 609.1      |
| $\Delta G$ C-N1 to C-N2  |                             | -47.513                                  |            |            |            |            |

---

**BMK/aug-cc-pVTZ-D3 CHCl3**

|                          | $E_{\text{tot}}$ (Hartrees) | $E_{\text{tot}}$ (kJ mol <sup>-1</sup> ) | $\Delta E$ | $\Delta H$ | $\Delta G$ | $\Delta S$ |
|--------------------------|-----------------------------|------------------------------------------|------------|------------|------------|------------|
| <b>Triene</b>            | -1069.06                    | -2806808                                 | 964.127    | 966.606    | 777.931    | 632.819    |
| <b>Cyclopentanone N1</b> | -1069.07                    | -2806853                                 | 965.19     | 967.669    | 787.424    | 604.544    |
| <b>Cyclopentanone N2</b> | -1069.08                    | -2806865                                 | 965.063    | 967.542    | 785.939    | 609.1      |
| $\Delta G$ C-N1 to C-N2  |                             | -13.2394                                 |            |            |            |            |

---

## 6 References

- (1) Helmy, S.; Oh, S.; Leibfarth, F. A.; Hawker, C. J.; Read De Alaniz, J. Design and Synthesis of Donor-Acceptor Stenhouse Adducts: A Visible Light Photoswitch Derived from Furfural. *J. Org. Chem.* **2014**, *79* (23), 11316–11329. <https://doi.org/10.1021/jo502206g>.
- (2) Dolomanov, O. V.; Bourhis, L. J.; Gildea, R. J.; Howard, J. A. K.; Puschmann, H. OLEX2: A Complete Structure Solution, Refinement and Analysis Program. *J. Appl. Crystallogr.* **2009**, *42* (2), 339–341. <https://doi.org/10.1107/S0021889808042726>.
- (3) Sheldrick, G. M. SHELXT - Integrated Space-Group and Crystal-Structure Determination. *Acta Crystallogr. Sect. A Found. Crystallogr.* **2015**, *71* (1), 3–8. <https://doi.org/10.1107/S2053273314026370>.
- (4) Sheldrick, G. M. Crystal Structure Refinement with SHELXL. *Acta Crystallogr. Sect. C Struct. Chem.* **2015**, *71* (Md), 3–8. <https://doi.org/10.1107/S2053229614024218>.
- (5) Stewart, J. J. P. Optimization of Parameters for Semiempirical Methods VI: More Modifications to the NDDO Approximations and Re-Optimization of Parameters. *J. Mol. Model.* **2013**, *19* (1), 1–32. <https://doi.org/10.1007/s00894-012-1667-x>.
- (6) M. W. Schmidt, K. K. Baldridge, J. A. Boatz, S. T. Elbert, M. S. Gordon, J. H. Jensen, S. Koseki, N. Matsunaga, K. A. Nguyen and S. Su, *J. Comput. Chem.*, 1993, *14*, 1347–1363 [CrossRef](#) [CAS](#)
- (7) A. D. Becke, *J. Chem. Phys.*, 1993, *98*, 1372 [CrossRef](#) [CAS](#)
- (8) C. Lee, W. Yang and R. G. Parr, *Phys. Rev. B: Condens. Matter Mater. Phys.*, 1988, *37*, 785 [CrossRef](#) [CAS](#)
- (9) A. D. Boese and J. M. L. Martin, *J. Chem. Phys.*, 2004, *121*, 3405–3416 [CrossRef](#) [CAS](#) [PubMed](#)
- (10) Y. Zhao and D. G. Truhlar, *Acc. Chem. Res.*, 2008, *41*, 157–167 [CrossRef](#) [CAS](#) [PubMed](#) .
- (11) S. Grimme, J. Antony, S. Ehrlich and H. Krieg, *J. Chem. Phys.*, 2010, *132*, 154104–154119 [CrossRef](#) [PubMed](#)
- (12) R. Peverati and K. K. Baldridge, *J. Chem. Theory Comput.*, 2008, *4*, 2030–2048 [CrossRef](#) [CAS](#)
